# Supplementary material
Source: PubMed Central journal article supplement (PMC5816697)
Supplement: NIHMS939451-supplement.pdf [file NIHMS939451-supplement.pdf]

# Supporting information

## Effects of rigidity on the selectivity of protein kinase inhibitors

Amir Assadieskandar,<sup>a</sup> Caiqun Yu,<sup>a</sup> Pierre Maisonneuve,<sup>c</sup> Xu Liu,<sup>a</sup> Ying-Chu Chen,<sup>a</sup> G. K. Surya Prakash,<sup>a</sup> Igor Kurinov,<sup>d</sup> Frank Sicheri,<sup>c</sup> and Chao Zhang<sup>\*,a,b</sup>

<sup>a</sup> Loker Hydrocarbon Research Institute & Department of Chemistry, University of Southern California, University Park, Los Angeles, CA 90089, USA

<sup>b</sup> USC Norris Comprehensive Cancer Center, University of Southern California, Los Angeles, CA 90089, USA

<sup>c</sup> Lunenfeld-Tanenbaum Research Institute, Mount Sinai Hospital, Toronto, Ontario, Canada

<sup>d</sup> NE-CAT APS, Building 436E, Argonne National Lab, 9700 S. Cass Avenue, Argonne, Illinois 60439, USA.

\* Corresponding author. Tel: (213)-740-7040, E-mail: [zhang.chao@usc.edu](mailto:zhang.chao@usc.edu)

**Table of content:**

|                                                                                     |     |
|-------------------------------------------------------------------------------------|-----|
| <b>Table S1.</b> Kinase Inhibition Profiles.....                                    | S3  |
| <b>Figure S1.</b> Percentage inhibition of Abl kinase.....                          | S4  |
| <b>Table S2.</b> BRAF: <b>2a</b> crystal structure refinement statistics.....       | S5  |
| <b>Figure S2.</b> Structural analysis of the BRAF: <b>2a</b> complex .....          | S6  |
| <b>Figure S3.</b> Downstream signaling of Bcr-Abl <sup>WT</sup> in Ba/F3 cells..... | S7  |
| <b>Table S3.</b> Solubility of Compound <b>1</b> .....                              | S8  |
| <b>Table S4.</b> Solubility of compound <b>2a</b> .....                             | S9  |
| <b>Table S5.</b> Permeability of compound <b>1</b> and <b>2a</b> .....              | S10 |
| <sup>1</sup> H-NMR spectra of title compounds .....                                 | S11 |
| <sup>13</sup> C-NMR spectra of title compounds .....                                | S31 |
| HPLC chromatograms of title compounds .....                                         | S38 |

**Table S1.** Kinase Inhibition Profiles of compounds **1** and **2a**<sup>a</sup>

| Kinase      | 1   | 2a  | Kinase      | 1   | 2a | Kinase     | 1   | 2a | Kinase    | 1   | 2a |
|-------------|-----|-----|-------------|-----|----|------------|-----|----|-----------|-----|----|
| ABL1        | 98  | 96  | EPH-A4      | 99  | 95 | MAPK3      | 1   | 1  | PKC-ZETA  | 2   | 4  |
| AKT1        | -1  | 0   | EPH-A5      | 100 | 95 | MAPKAPK-2  | -1  | 5  | PKN1      | -2  | 6  |
| AKT2        | 0   | -10 | EPH-A8      | 100 | 97 | MAPKAPK-3  | 13  | 3  | PKN2      | 3   | 8  |
| AKT3        | 2   | 3   | EPH-B1      | 97  | 84 | MARK1      | 1   | -2 | PLK1      | 1   | 1  |
| ALK         | 6   | 1   | EPH-B2      | 99  | 97 | MARK3      | -1  | 1  | PLK3      | 3   | 0  |
| AMP-A1B1G1  | 2   | 0   | EPH-B3      | 98  | 86 | MARK4      | -4  | -1 | PLK4      | 74  | 5  |
| AMP-A2B1G1  | 3   | 1   | EPH-B4      | 97  | 80 | MEK1       | 13  | -8 | PRAK      | -1  | 7  |
| ARG         | 99  | 94  | ERB-B2      | 58  | 0  | MEK2       | 25  | 6  | PRKACA    | 2   | 4  |
| ARK5        | 14  | 1   | ERB-B4      | 88  | 4  | MELK       | -3  | 2  | PRKD1     | 4   | 3  |
| AURORA-A    | 90  | 29  | FAK         | -8  | 3  | MER        | 6   | 0  | PRKD2     | 1   | 2  |
| AURORA-B    | 82  | 27  | FER         | 40  | 12 | MET        | 8   | -1 | PRKD3     | -1  | 1  |
| AURORA-C    | 33  | -2  | FES         | 21  | 0  | MKNK1      | 0   | 2  | PRKG1     | 1   | 1  |
| AXL         | 12  | 2   | FGFR1       | 98  | 91 | ALPHA      | 0   | 2  | PRKG2     | 24  | 9  |
| BLK         | 95  | 57  | FGFR2       | 99  | 96 | MRCK-BETA  | -1  | 1  | PRKX      | 2   | -4 |
| BMX         | 98  | 36  | FGFR3       | 52  | 34 | MSK1       | -11 | 5  | PTK5      | 95  | 18 |
| BRAF        | 101 | 92  | FGFR4       | 89  | 62 | MSK2       | 3   | 5  | PYK2      | 74  | 1  |
| BRK         | 97  | 86  | FGR         | 99  | 71 | MSSK1      | 9   | 0  | RET       | 100 | 98 |
| BRSK1       | -10 | 0   | FLT-1       | 99  | 89 | MST1       | 10  | 4  | RIPK2     | 98  | 82 |
| BRSK2       | -3  | 0   | FLT-3       | 29  | 7  | MST2       | 2   | 2  | ROCK1     | 5   | 1  |
| BTK         | 71  | 5   | FLT-4       | 99  | 97 | MST3       | 0   | 3  | ROCK2     | 18  | 4  |
| CAMK1A      | 2   | 1   | FMS         | 99  | 87 | MST4       | 9   | -1 | RON       | 2   | 1  |
| CAMK1D      | 7   | 10  | FYN         | 101 | 85 | MUSK       | 8   | 3  | ROS       | 18  | 5  |
| CAMK2A      | 3   | 6   | GRK6        | -9  | 3  | NDR2       | 1   | -1 | RSK1      | 9   | 1  |
| CAMK2B      | 1   | 5   | GRK7        | 1   | 5  | NDRG1      | -3  | 6  | RSK2      | 0   | 0  |
| CAMK2D      | -1  | 0   | GSK-3-ALPHA | 5   | 6  | NEK1       | -1  | -5 | RSK3      | 10  | 2  |
| CAMK2G      | 0   | 2   | GSK-3-BETA  | 19  | 3  | NEK2       | -1  | 0  | RSK4      | 2   | 0  |
| CAMK4       | 11  | 6   | HASPIN      | 5   | 1  | NEK6       | 0   | -5 | SGK1      | -1  | 0  |
| CDK1        | 6   | 0   | HCK         | 107 | 81 | NEK7       | 1   | -2 | SGK2      | 0   | -2 |
| CDK2        | 3   | 1   | HIPK1       | -3  | -2 | NEK9       | 2   | -1 | SGK3      | -2  | -3 |
| CYCLINE     | 1   | -1  | HIPK2       | 0   | -1 | P38-ALPHA  | 70  | 15 | SIK       | 43  | 7  |
| CYCLINE     | 3   | 3   | HIPK3       | 0   | -1 | P38-BETA   | 23  | 3  | SLK       | 92  | 18 |
| CYCLIND     | -1  | 0   | HIPK4       | 29  | 9  | P38-DELTA  | 0   | 2  | SNF1LK2   | 7   | 10 |
| CDK5        | 2   | 3   | IGF1R       | 1   | 2  | P38-GAMMA  | 1   | 0  | SPHK1     | 2   | 4  |
| CDK5-P25    | 2   | 2   | IKK-ALPHA   | 26  | -3 | P70S6K1    | 5   | 1  | SPHK2     | 0   | 20 |
| CYCLIND3    | 8   | 1   | IKK-BETA    | 22  | 2  | P70S6K2    | 5   | 3  | SRC       | 100 | 80 |
| CYCLINT1    | 5   | -2  | IKK-EPSILON | 17  | 8  | PAK1       | 0   | -1 | SRMS      | 55  | 20 |
| CHEK1       | -1  | -1  | INSR        | 12  | 5  | PAK2       | 1   | -2 | SRPK1     | 1   | 2  |
| CHEK2       | 3   | -4  | IRAK1       | 28  | -3 | PAK3       | 2   | 1  | SRPK2     | -1  | -1 |
| CK1         | 10  | 2   | IRAK4       | 2   | 3  | PAK4       | 0   | 2  | STK16     | 8   | 2  |
| CK1-EPSILON | 27  | 8   | IRR         | 2   | -3 | PAK5       | 0   | -4 | STK25     | -5  | 3  |
| CK1-GAMMA1  | 9   | -5  | ITK         | 23  | 10 | PAK6       | -1  | 3  | SYK       | -4  | 6  |
| CK1-GAMMA2  | 1   | 2   | JAK1        | 97  | -3 | ALPHA      | 0   | 0  | TAK1-TAB1 | 62  | 5  |
| CK1-GAMMA3  | 2   | -16 | JAK2        | 77  | 3  | PASK       | -4  | 1  | TAOK2     | 17  | 17 |
| CLK1        | 2   | -1  | JAK3        | 30  | 10 | ALPHA      | 100 | 94 | TAOK3     | 37  | 33 |
| CLK2        | 5   | -1  | JNK1        | -9  | 2  | BETA       | 100 | 71 | TBK1      | 6   | 1  |
| CLK3        | -1  | 6   | JNK2        | 26  | 8  | PDK1       | 4   | 5  | TEC       | 40  | 2  |
| CRAF        | 118 | 101 | JNK3        | -8  | 5  | PERK       | 29  | 0  | TIE2      | 96  | 61 |
| CSK         | 93  | 31  | KDR         | 109 | 98 | GAMMA1     | -3  | 10 | TNIK      | 71  | 4  |
| DAPK1       | -2  | -2  | KIT         | 98  | 97 | GAMMA2     | -8  | 4  | TNK1      | 84  | 19 |
| DAPK3       | 11  | 11  | LATS1       | -4  | 3  | ALPHA      | 36  | -8 | TNK2      | 13  | 3  |
| DCAMKL2     | 0   | -1  | LATS2       | 0   | -2 | PI4-K-BETA | 1   | -5 | TRKA      | 22  | 2  |
| DDR2        | 93  | 96  | LCK         | 100 | 85 | PIM2       | -1  | 0  | TRKB      | 43  | 13 |
| DYRK1A      | 2   | 2   | LOK         | 97  | 59 | PIM3       | 0   | 1  | TRKC      | 59  | 14 |
| DYRK1B      | 0   | 1   | G2019S      | 36  | 3  | PKACB      | 2   | 3  | TSSK1     | 0   | -1 |
| DYRK2       | 11  | -3  | LTK         | 4   | 8  | PKC-ALPHA  | -7  | 2  | TSSK2     | -10 | 1  |
| DYRK3       | 7   | 1   | LYNA        | 99  | 95 | PKC-BETA1  | -3  | 2  | TTK       | 33  | -3 |
| DYRK4       | -1  | -7  | LYNB        | 100 | 94 | PKC-BETA2  | 2   | 5  | TXK       | 94  | 5  |
| EGFR        | 55  | 3   | MAP4K2      | 67  | 24 | PKC-ETA    | -5  | 2  | TYK2      | 31  | 2  |
| EPH-A1      | 97  | 46  | MAP4K4      | 69  | 3  | PKC-GAMMA  | -1  | 2  | TYRO3     | 67  | 2  |
| EPH-A2      | 100 | 90  | MAP4K5      | 66  | 33 | PKC-IOTA   | -3  | 2  | YES       | 101 | 88 |
| EPH-A3      | 98  | 76  | MAPK1       | 0   | 2  | PKC-THETA  | 0   | -2 | ZAP70     | 3   | 4  |

<sup>a</sup>Selectivity profiling of **1** and **2a** was performed using Nanosyn Kinase Profiling Service. Value in each cell represents mean percentage inhibition (from duplicates) of the kinase by the drug (1µM). Red: inhibition >90%; yellow: inhibition 40-90%; green: inhibition <40%.

**Figure S1.** Percentage inhibition of Abl kinase by compounds **1** and **2a-g** at a fixed concentration of 30 nM.

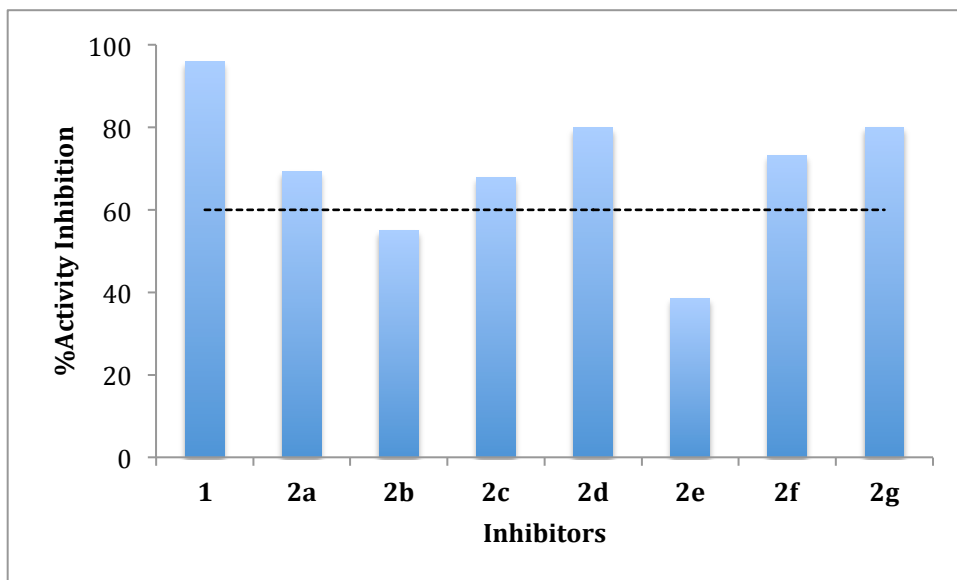

**Table S2.** BRAF:2a crystal structure refinement statistics

|                                      | BRAF:2a                          |
|--------------------------------------|----------------------------------|
| Search model                         | 4R5Y                             |
| Space Group                          | P2 <sub>1</sub> 2 <sub>1</sub> 2 |
| Wavelength (Å)                       | 0.97910                          |
| <b>Unit Cell</b>                     |                                  |
| a                                    | 85.47                            |
| b                                    | 114.53                           |
| c                                    | 55.59                            |
| α                                    | 90                               |
| β                                    | 90                               |
| γ                                    | 90                               |
| Molecules/ASU                        | 2                                |
| <b>Data processing</b>               |                                  |
| Resolution (Å)                       | 50.00 – 2.55<br>(2.70 – 2.55)    |
| Total no. of reflections             | 117664                           |
| Total no. of unique reflections      | 18363                            |
| Redundancy                           | 6.4 (6.6)                        |
| I/σI                                 | 10.52 (0.6)                      |
| Completeness (%)                     | 99.7 (99.9)                      |
| R <sub>meas</sub>                    | 0.15 (3.50)                      |
| CC (1/2)                             | (0.557)                          |
| <b>Refinement*</b>                   |                                  |
| R <sub>work</sub> /R <sub>Free</sub> | 25.3/28.3                        |
| No. Atoms                            |                                  |
| Protein                              | 3672                             |
| Ligand (2a)                          | 70                               |
| Water                                | 3                                |
| <b>Average B-factors</b>             |                                  |
| Protein                              | 101.7                            |
| Ligand (2a)                          | 83.8                             |
| Water                                | 88.8                             |
| <b>RMSD from ideal geometry</b>      |                                  |
| Bond Lengths (Å)                     | 0.002                            |
| Bond Angles (°)                      | 0.546                            |
| <b>Ramachandran statistics</b>       |                                  |
| Residues in favoured regions (%)     | 97.7                             |
| Residues in allowed regions (%)      | 2.3                              |
| Residues in disallowed regions (%)   | 0                                |
| PDB ID                               |                                  |

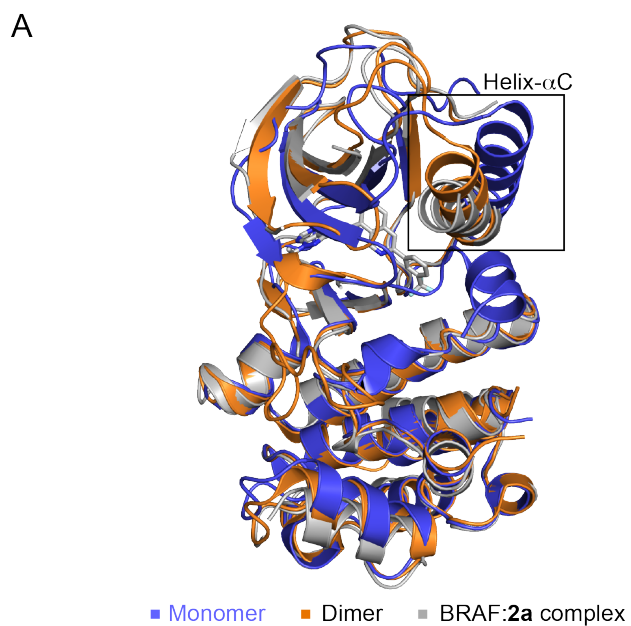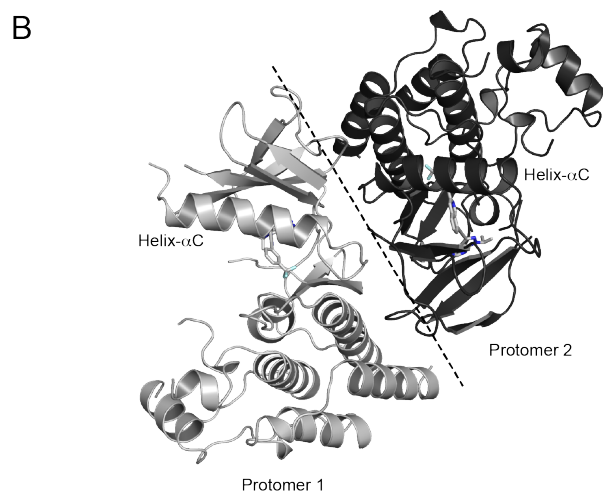

**Figure S2.** Structural analysis of the BRAF:2a complex. (A) Comparison of the BRAF:2a complex structure with an off-state (monomer) and an on-state (dimer) of BRAF (PDB 4WO5 and PDB 4H58, respectively). (B) The asymmetric unit of the BRAF:2a complex forms a side-to-side dimer reflective of the kinase active state.

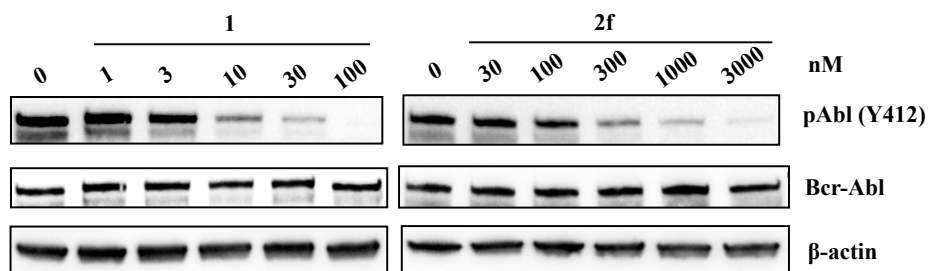

**Figure S3.** Effects of **1** and compound **2f** on downstream signaling of Bcr-Abl<sup>WT</sup> in Ba/F3 cells. Ba/F3 cells expressing Bcr-Abl<sup>WT</sup> were cultured at a density of  $8 \times 10^5$  cells/mL and treated for 3 h at indicated concentrations of **1** and **2f**. The cell lysates were resolved by PAGE, transferred to nitrocellulose membrane, and sequentially probed with antibodies for Abl, pY412-Abl, and β-actin.

**Table S3. Solubility of Compound 1**

| Std Concentration (uM)     | AUC      |          |          | Average  | StD      |
|----------------------------|----------|----------|----------|----------|----------|
|                            | Inj 1    | Inj2     | Inj3     |          |          |
| 1.5625                     | 45901    | 45817    | 45535    | 45751    | 191.7185 |
| 6.25                       | 181708   | 184151   | 182559   | 182806   | 1240.088 |
| 25                         | 720683   | 723684   | 725498   | 723288.3 | 2431.763 |
| 100                        | 2859788  | 2871196  | 2839198  | 2856727  | 16217.08 |
| 400                        | 11676645 | 11536201 | 11562619 | 11591822 | 74637.3  |
| 1000                       | 27266144 | 27041258 | 27130304 | 27145902 | 113251.5 |
| Unknown ( 2 folds diluted) | 2359566  | 2307116  | 2315327  | 2327336  | 28212.03 |

Unknown concentration (uM)

80.56

Solubility of 1 in 37 C (uM)

161.12

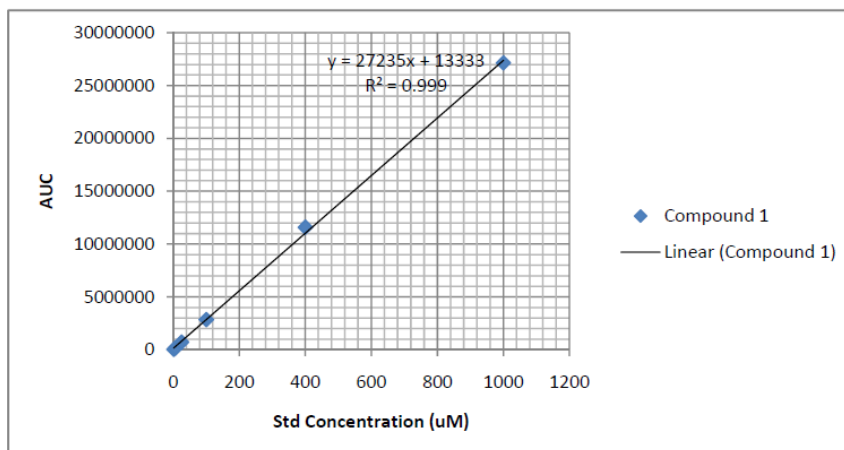



**Table S4. Solubility of compound 2a**

| Std Concentration (uM)     | AUC     |         |         | Average  | StD      |
|----------------------------|---------|---------|---------|----------|----------|
|                            | Inj 1   | Inj2    | Inj3    |          |          |
| 0.625                      | 20122   | 22373   | 19675   | 20723.33 | 1446.03  |
| 2.5                        | 75798   | 75285   | 76054   | 75712.33 | 391.592  |
| 10                         | 300519  | 302139  | 299106  | 300588   | 1517.677 |
| 40                         | 1233407 | 1209382 | 1200864 | 1214551  | 16876.04 |
| 160                        | 4764443 | 4737779 | 4718575 | 4740266  | 23034.89 |
| Unknown ( 2 folds diluted) | 889624  | 917639  | 883567  | 896943.3 | 18177.04 |

Unknown concentration (uM)

30.01

Solubility of 2a in 37 C (uM)

60.02

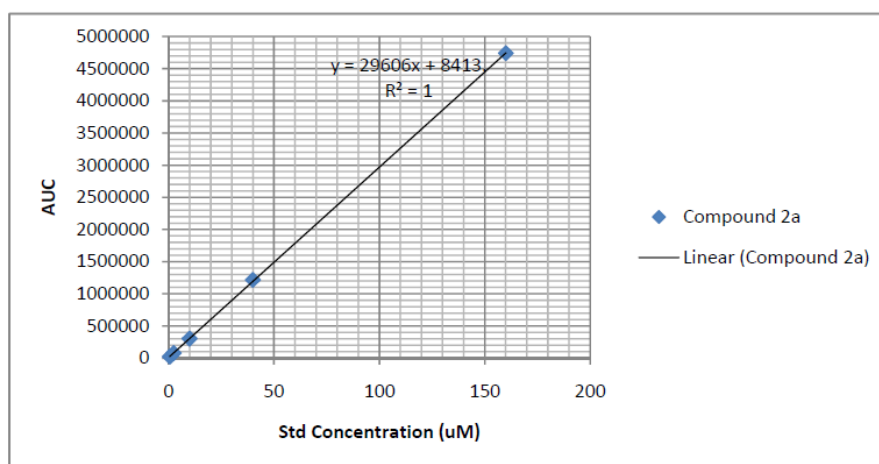

**Table S5.** Permeability of compound **1** and **2a**

| Permeability Assay in Caco-2 Data Report |         |                  |                 |               |                                     |      |              |                             |                       |
|------------------------------------------|---------|------------------|-----------------|---------------|-------------------------------------|------|--------------|-----------------------------|-----------------------|
| Sample ID                                | M.W     | cell number/well | Donor buffer pH | Pgp inhibitor | Papp (x10 <sup>-6</sup> cm/s) (N=2) |      | Efflux ratio | Permeability Classification | Pgp or BCRP substrate |
|                                          |         |                  |                 |               | A→B                                 | B→A  |              |                             |                       |
| Digoxin                                  | 780.940 | 60000            | 7.4             | minus         | 1.2                                 | 32.4 | 26.1         | low                         | yes                   |
|                                          |         |                  |                 | plus          | 8.9                                 | 9.3  | 1.0          |                             |                       |
| Propranolol                              | 295.800 |                  |                 | minus         | 33.0                                | 20.9 | 0.6          | Medium                      | No                    |
|                                          |         |                  |                 | plus          | 44.4                                | 20.0 | 0.5          |                             |                       |
| 1                                        | 464.157 |                  |                 | minus         | 0.5                                 | 1.0  | 1.9          | low                         | No                    |
|                                          |         |                  |                 | plus          | 0.6                                 | 0.3  | 0.5          |                             |                       |
| 2a                                       | 472.162 |                  |                 | minus         | 0.8                                 | 2.6  | 3.2          | low                         | yes                   |
|                                          |         |                  |                 | plus          | 0.2                                 | 0.3  | 1.1          |                             |                       |

Papp A→B > 25(10<sup>-6</sup> cm/s)                      high  
 Papp A→B 0-25 (10<sup>-6</sup> cm/s)                      med  
 Papp A→B < 10 (10<sup>-6</sup> cm/s)                      low

Efflux > 3.0 minus Pgp inhibitor                      Pgp substrate  
 Efflux ≤ 1.0 plus Pgp inhibitor

<sup>1</sup>H NMR Compound 4a

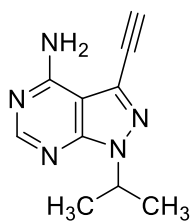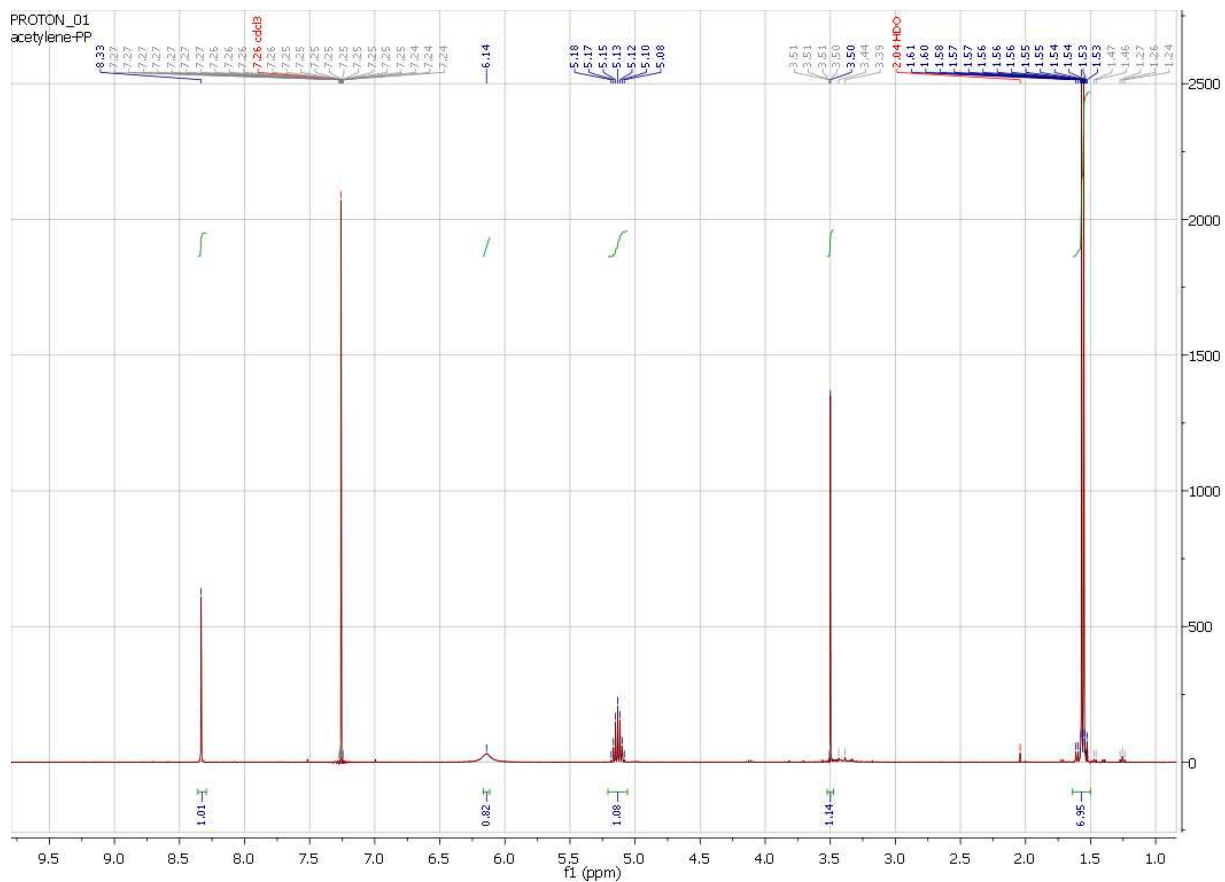

<sup>1</sup>H NMR Compound 4b

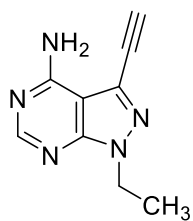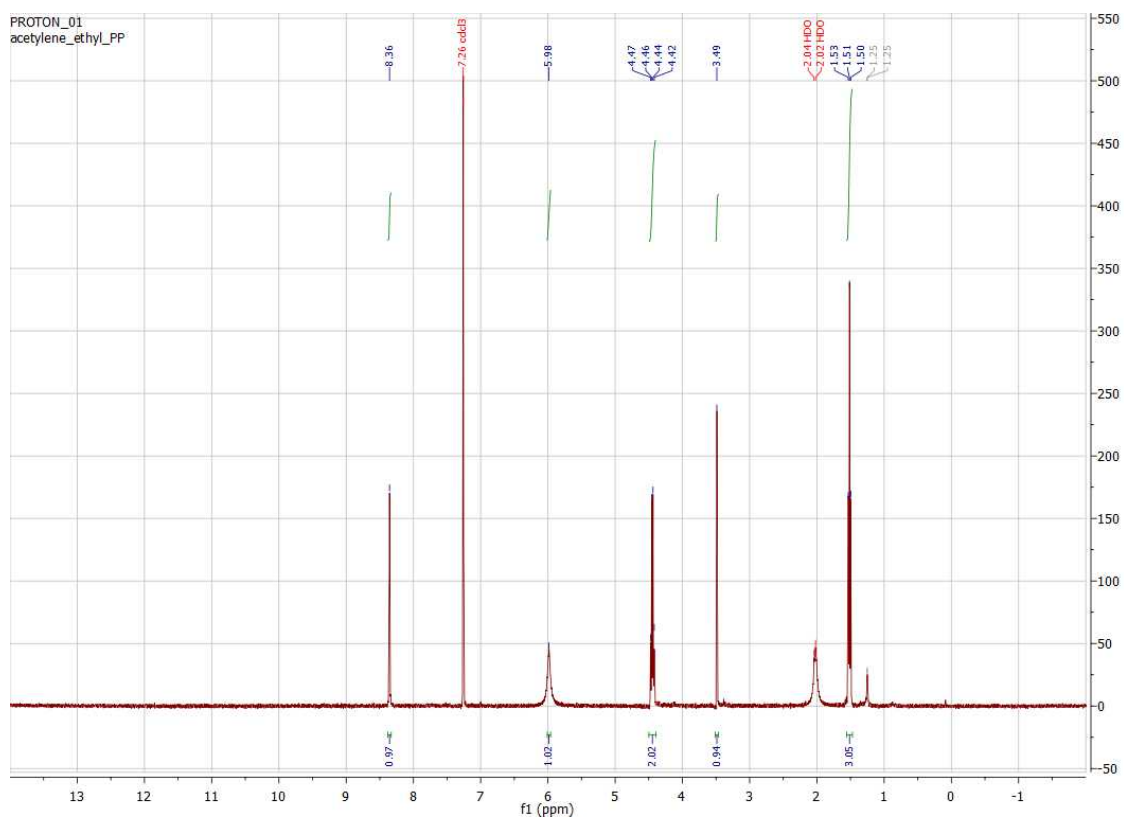

<sup>1</sup>H NMR Compound 5a

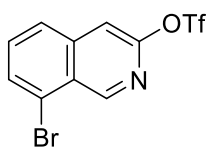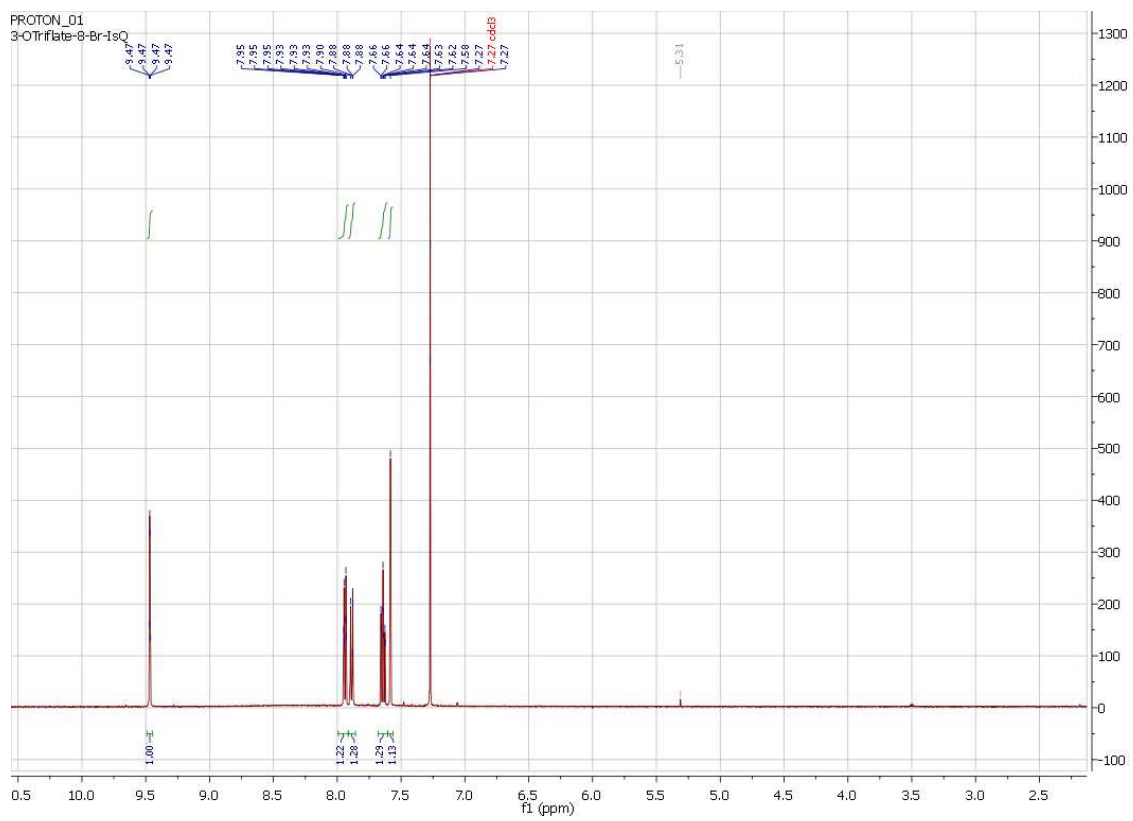

<sup>1</sup>H NMR Compound 6a

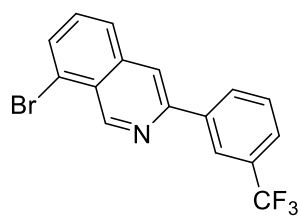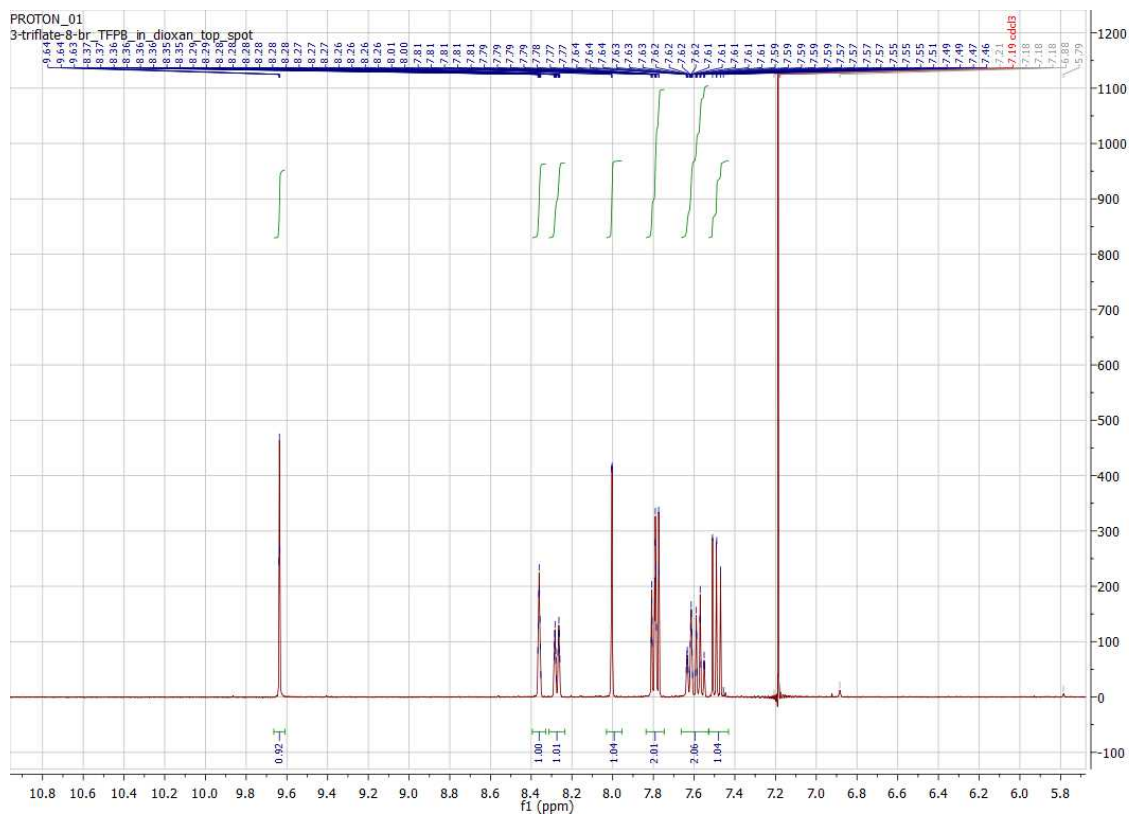

<sup>1</sup>H NMR Compound **6b**

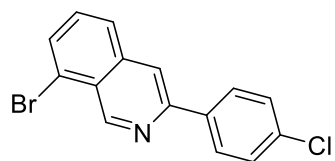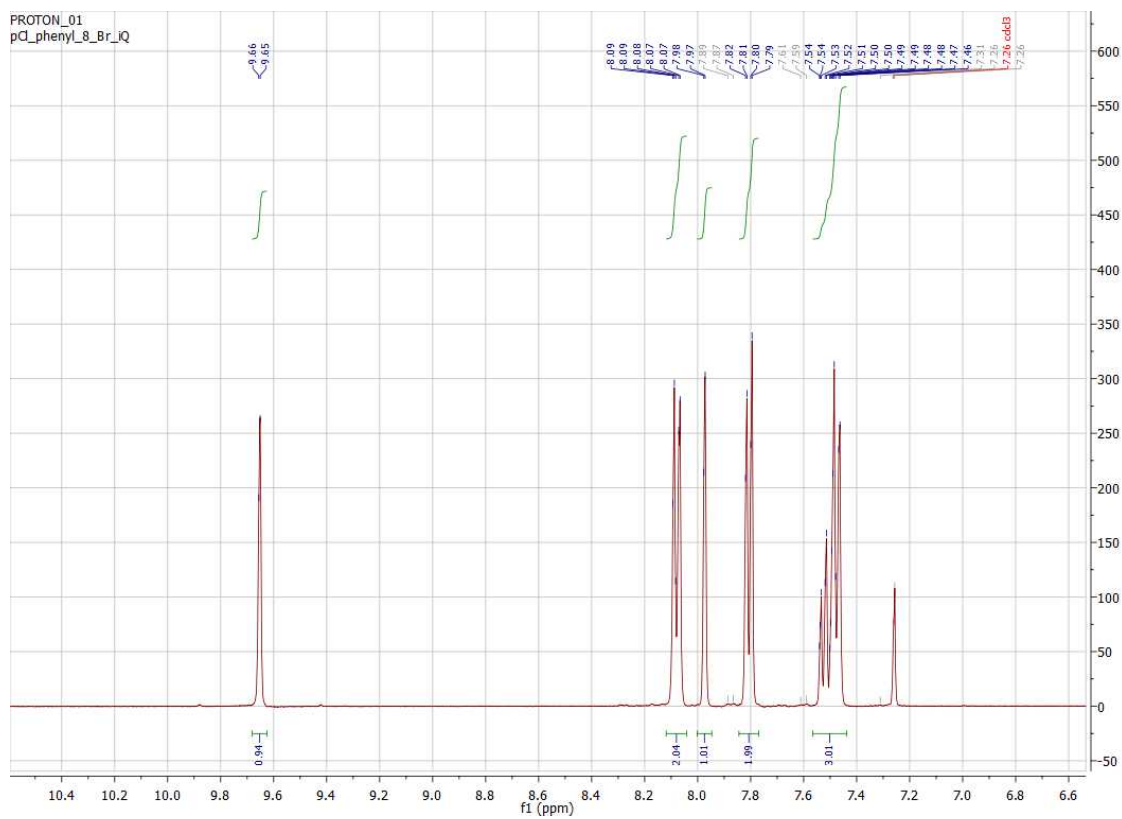

<sup>1</sup>H NMR Compound 6c

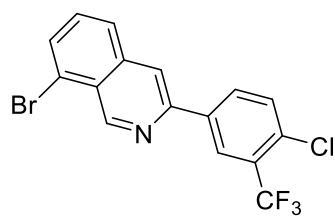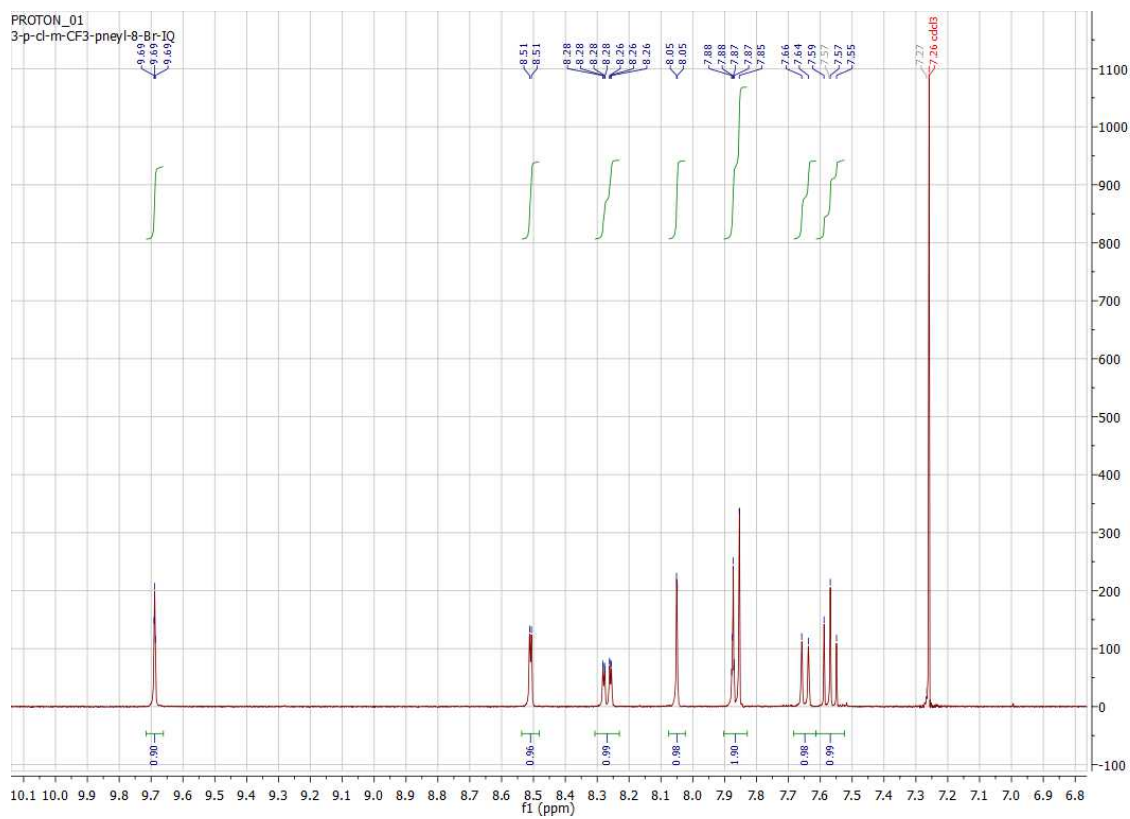



# <sup>1</sup>H NMR Compound 6d

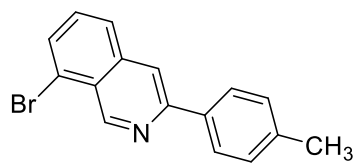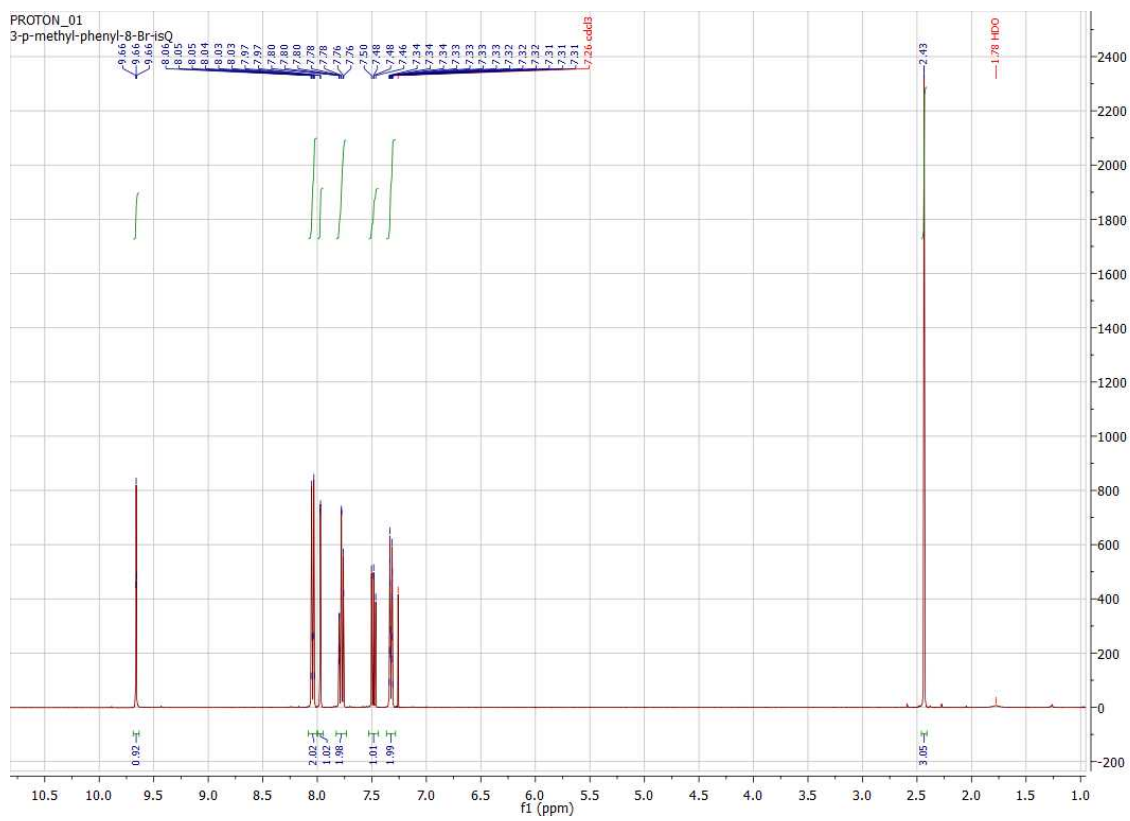

# <sup>1</sup>H NMR Compound 6e

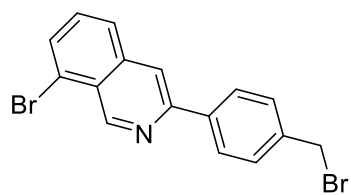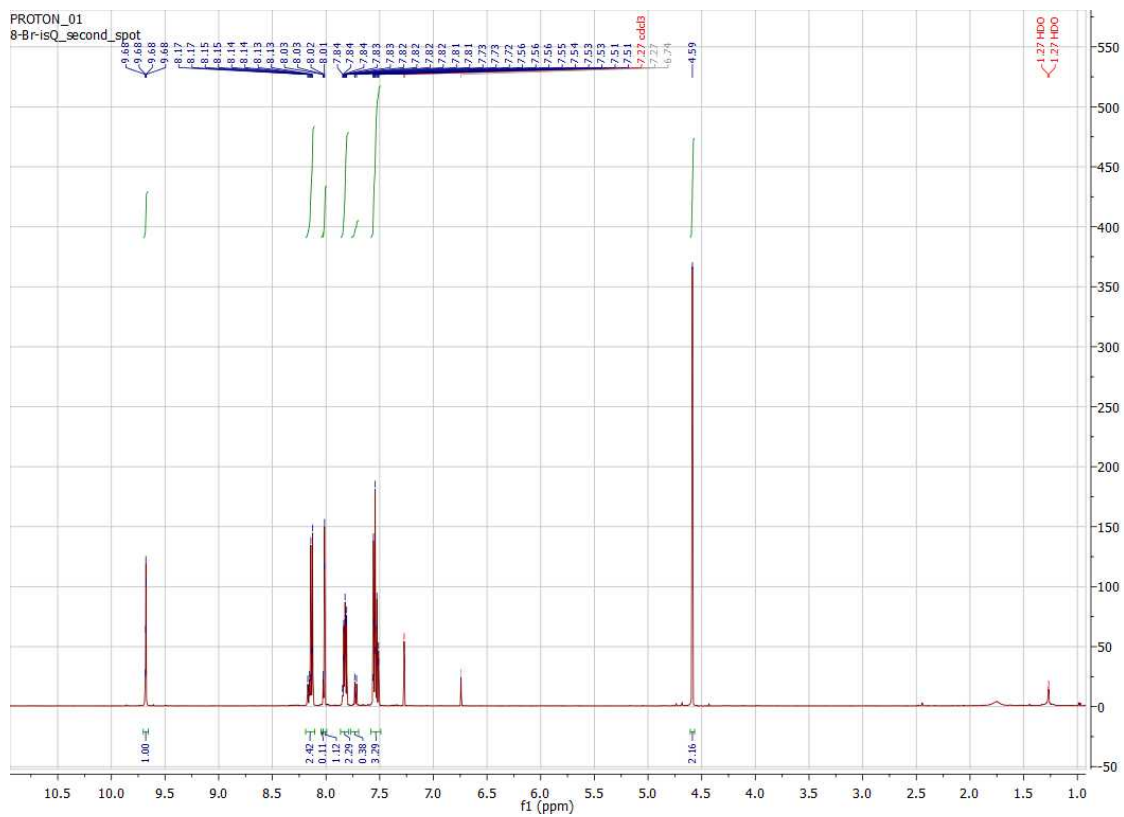

<sup>1</sup>H NMR Compound 6f

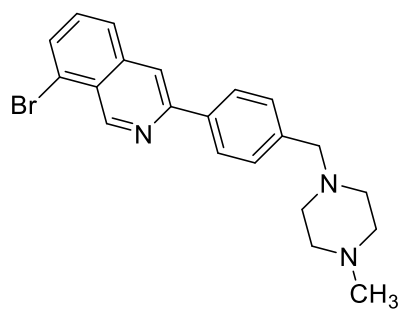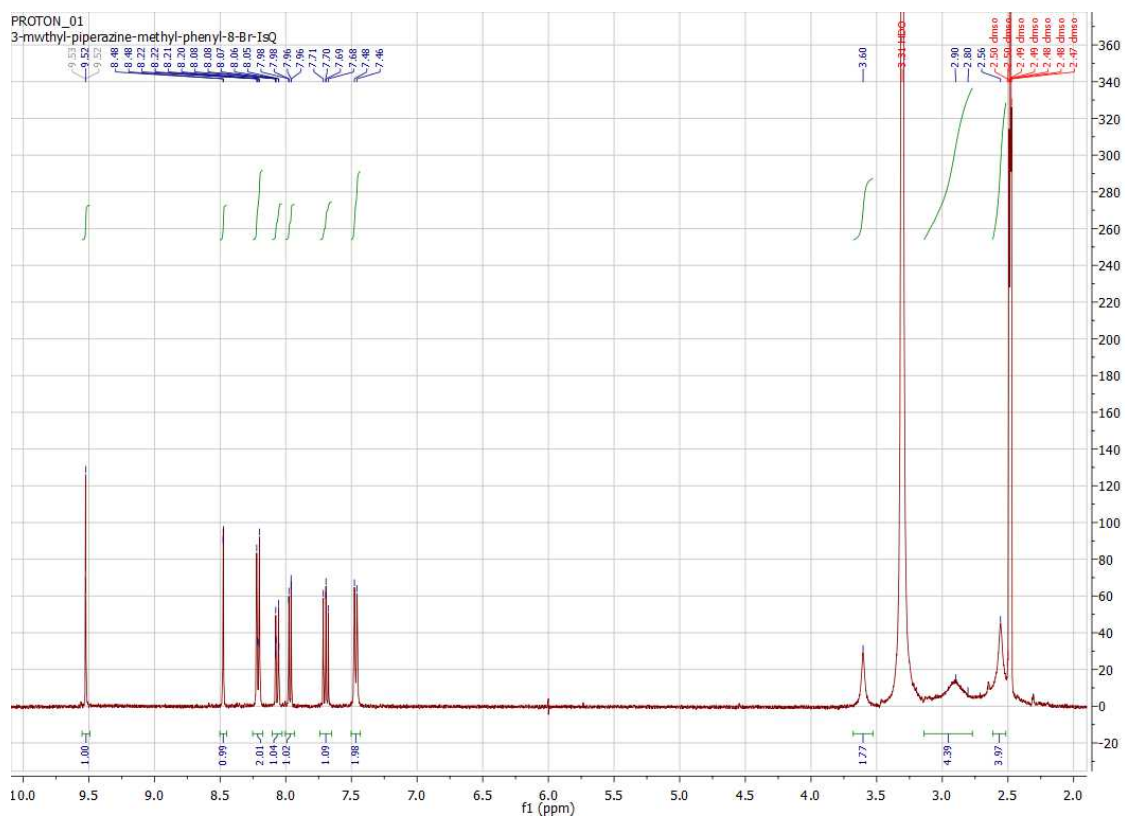

<sup>1</sup>H NMR Compound 2a

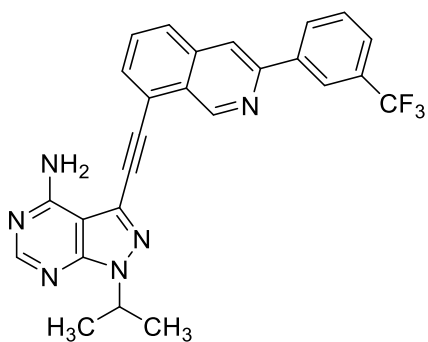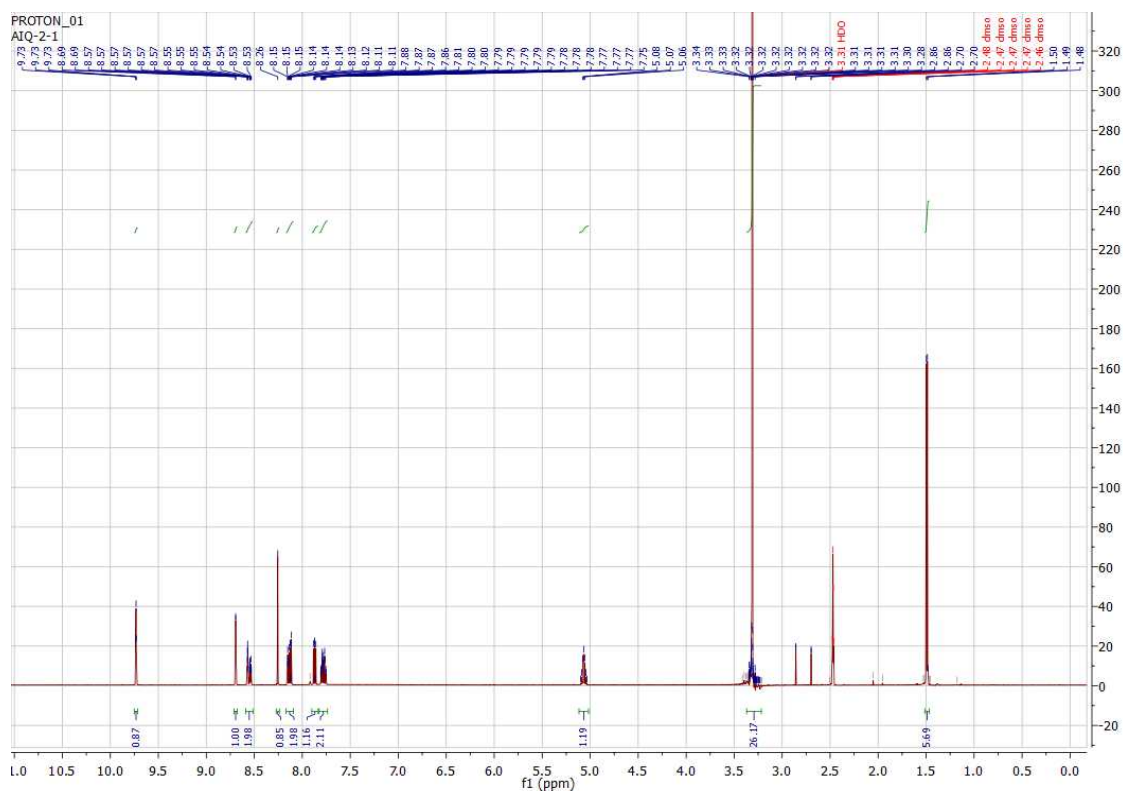







<sup>1</sup>H NMR Compound 2e

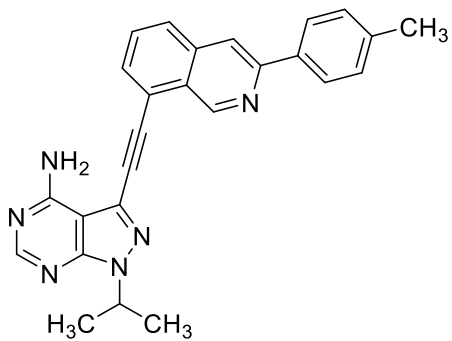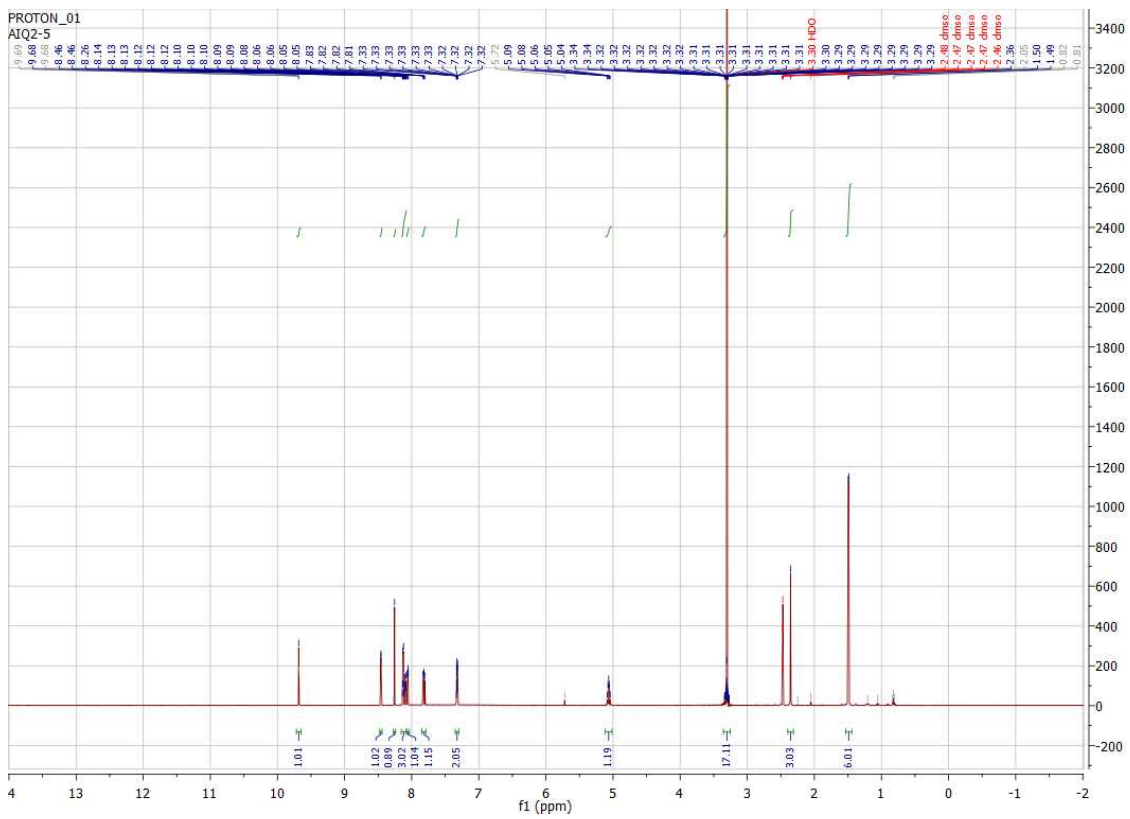



# <sup>1</sup>H NMR Compound 2f

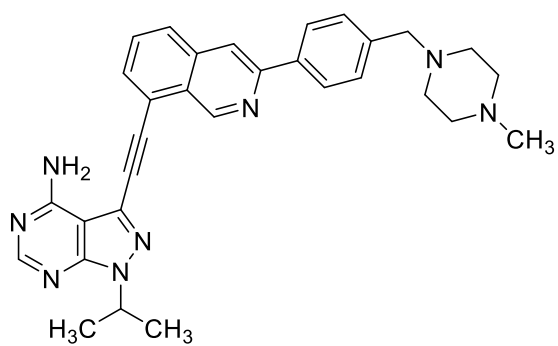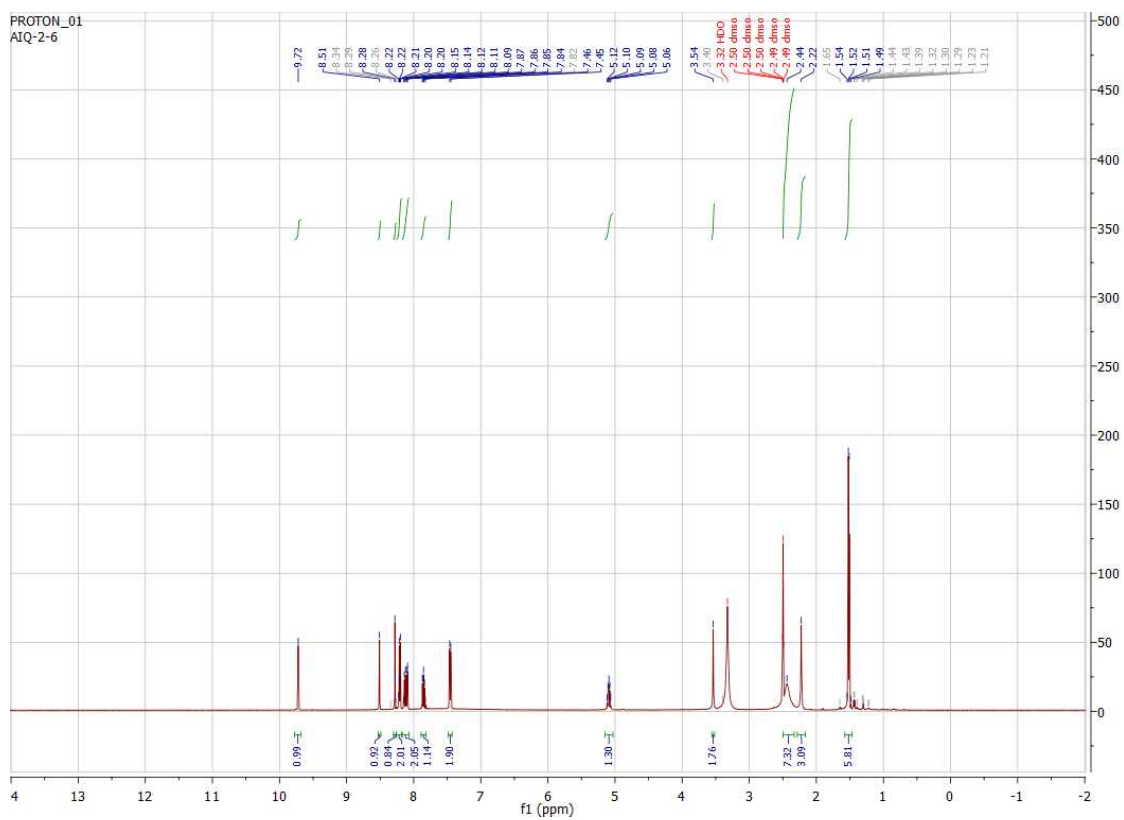



<sup>1</sup>H NMR Compound 9

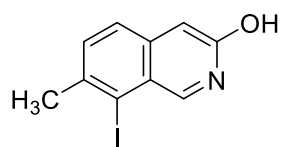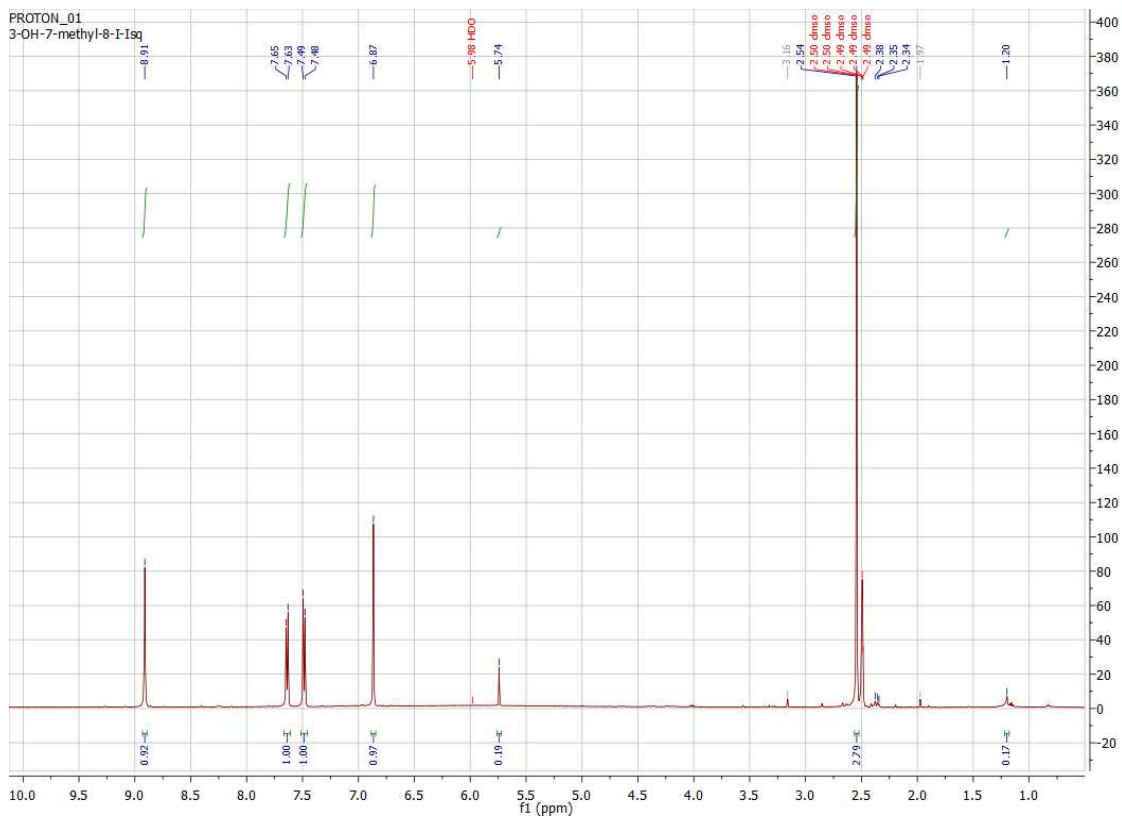



<sup>1</sup>H NMR Compound 10

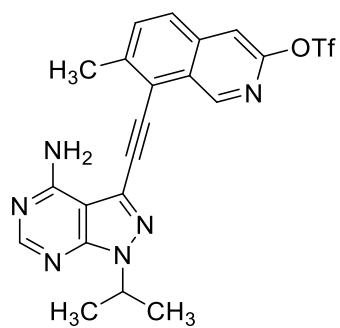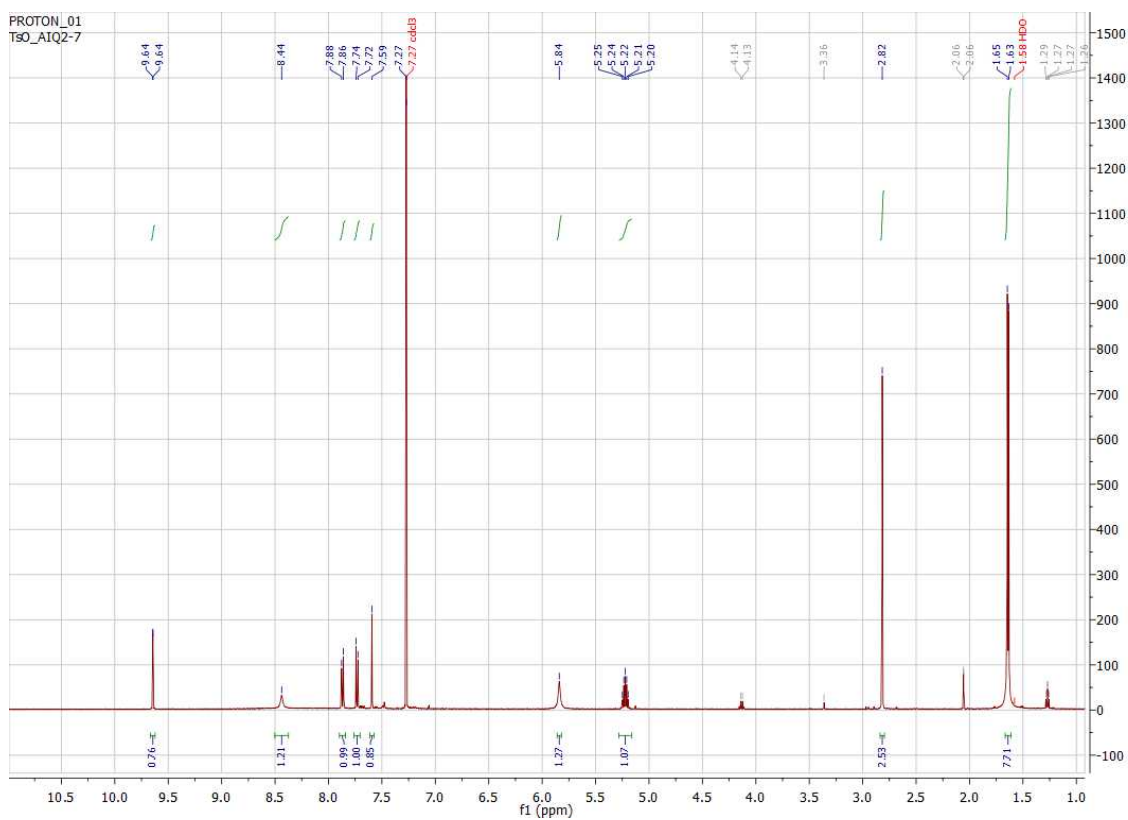

# <sup>1</sup>H NMR Compound 2g

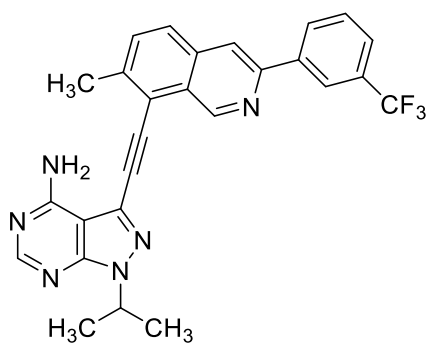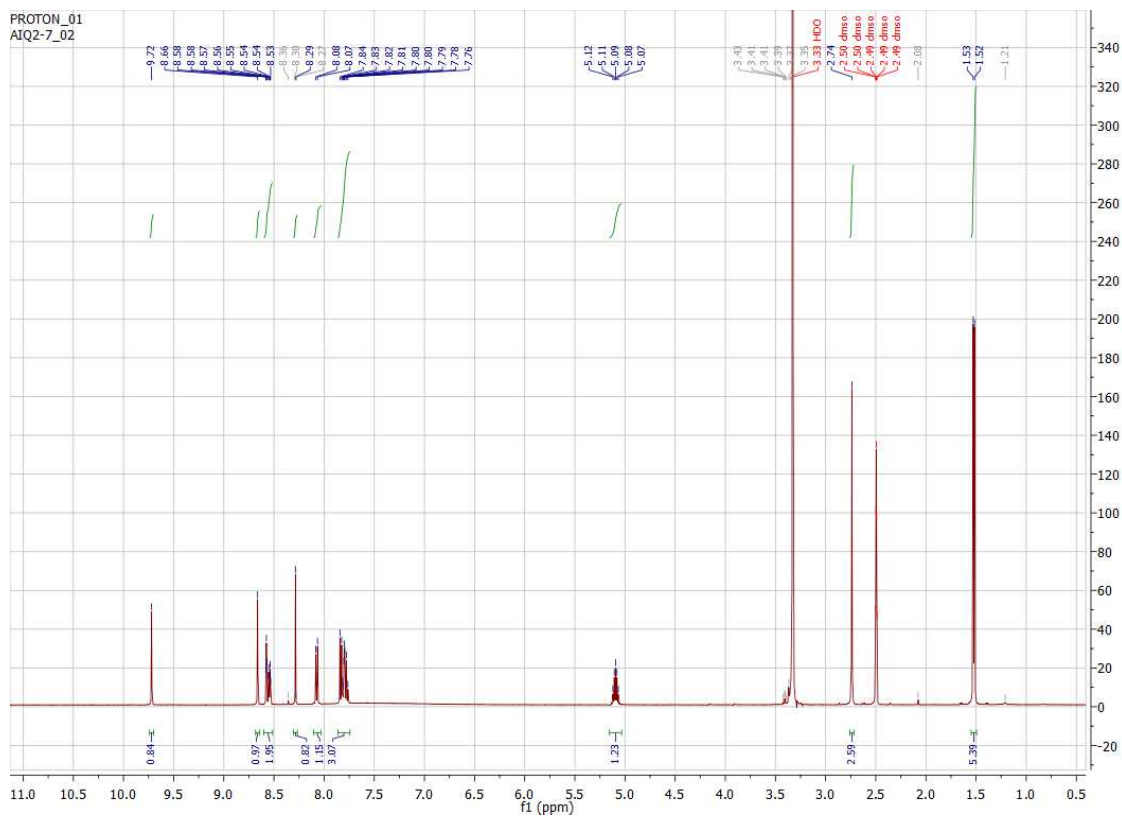

<sup>13</sup>CNMR Compound **2a**

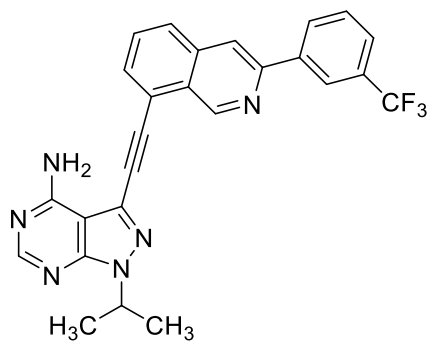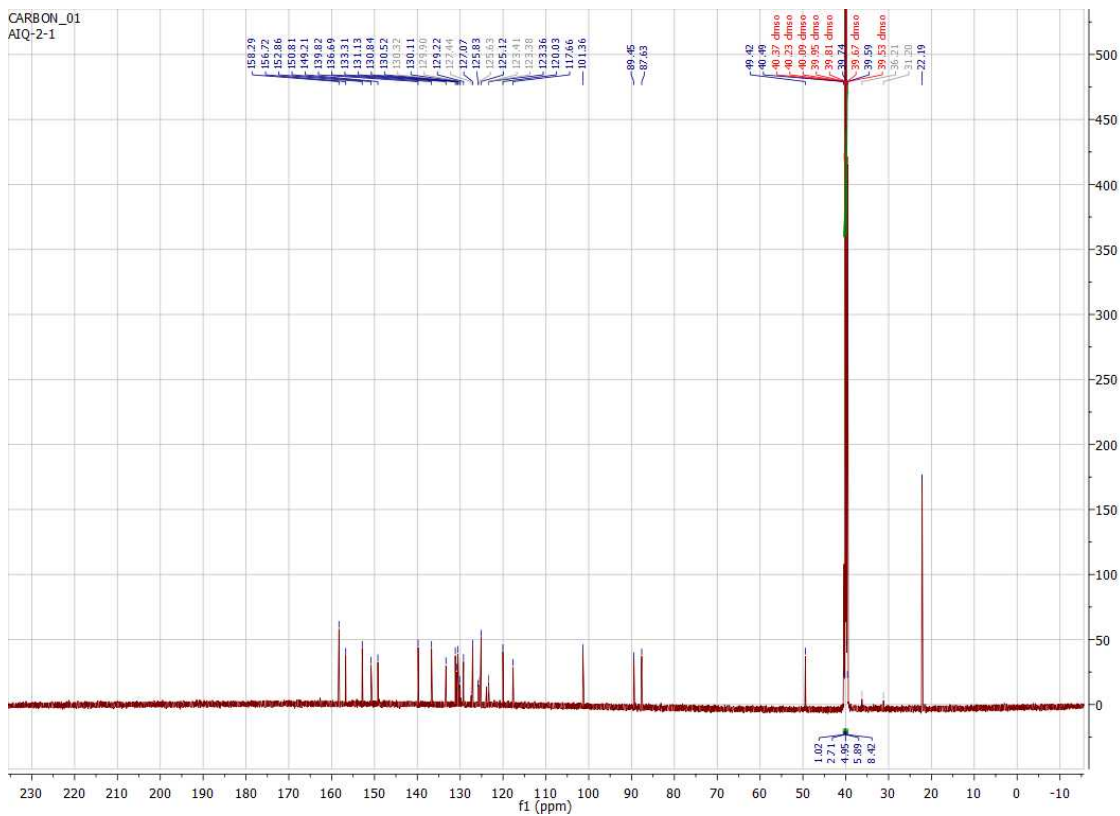

<sup>13</sup>CNMR Compound **2b**

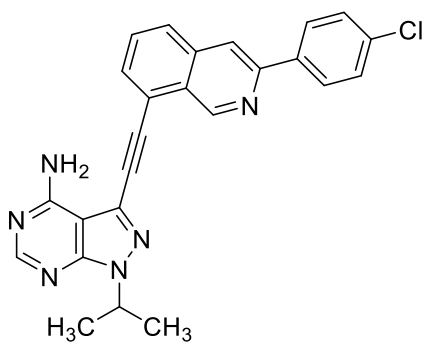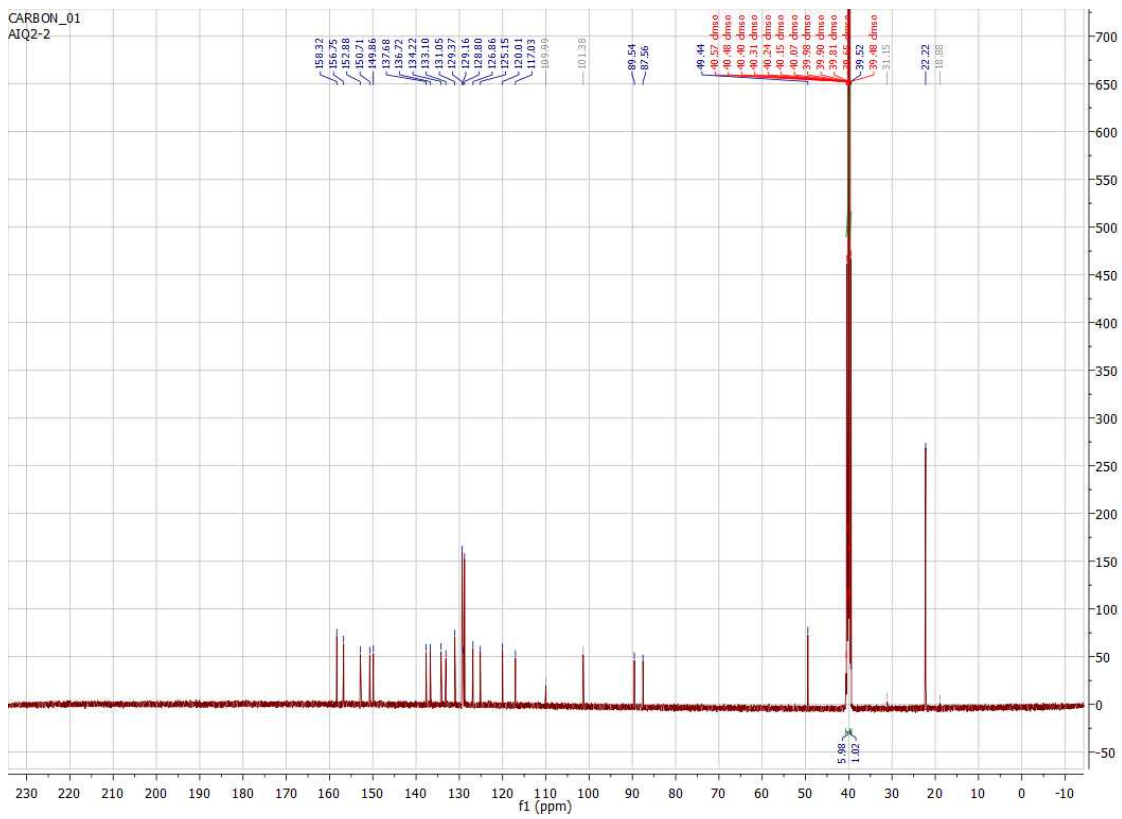



<sup>13</sup>CNMR Compound 2c

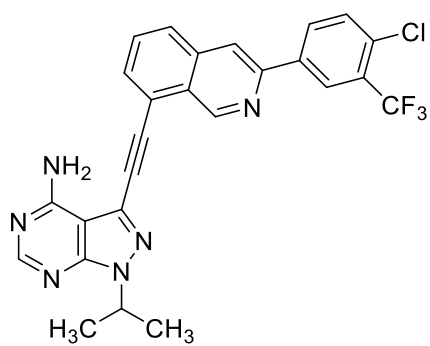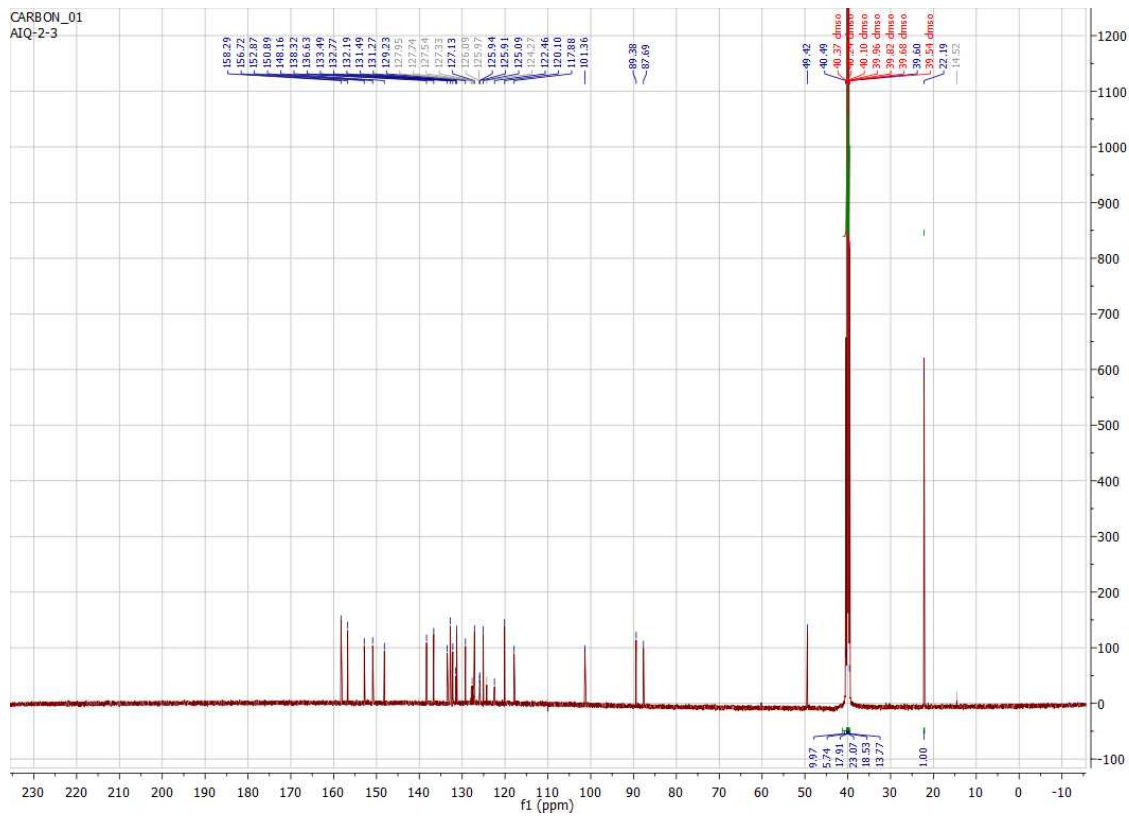

<sup>13</sup>CNMR Compound **2d**

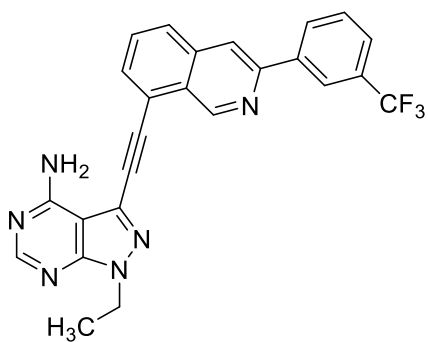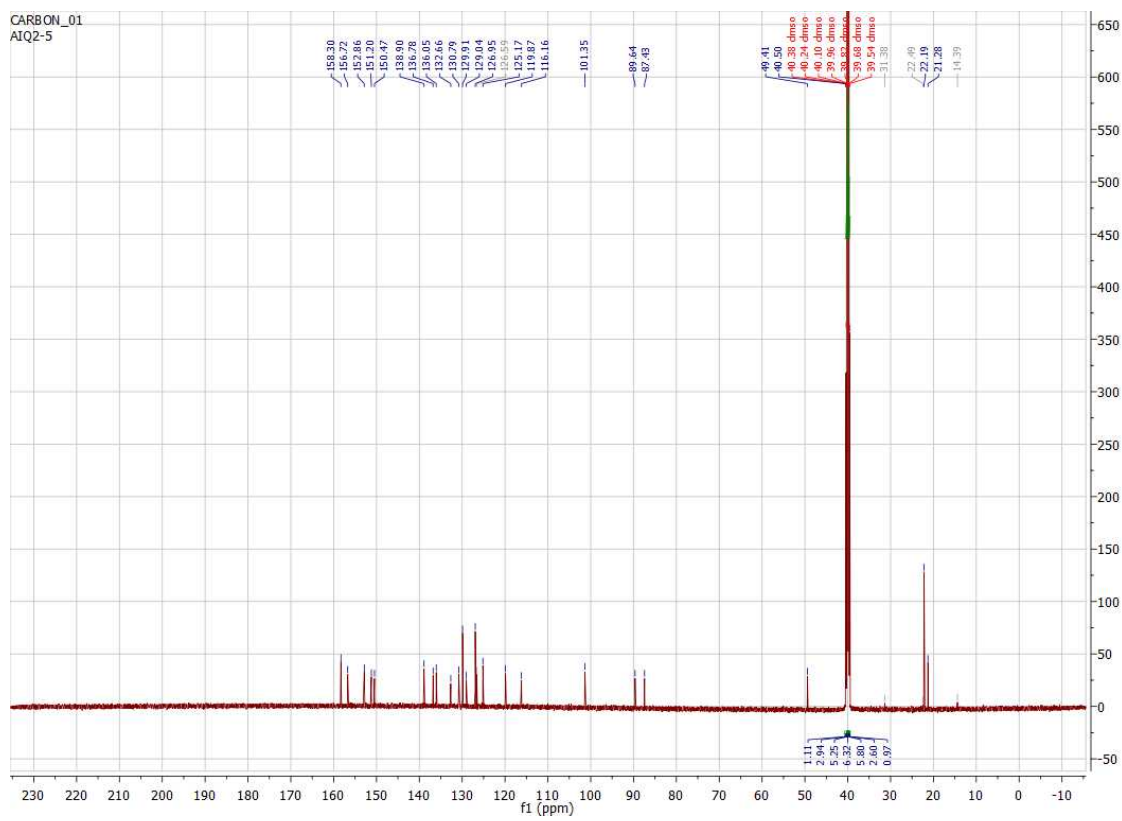

<sup>13</sup>CNMR Compound 2e

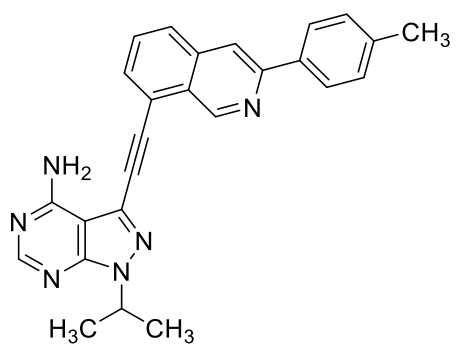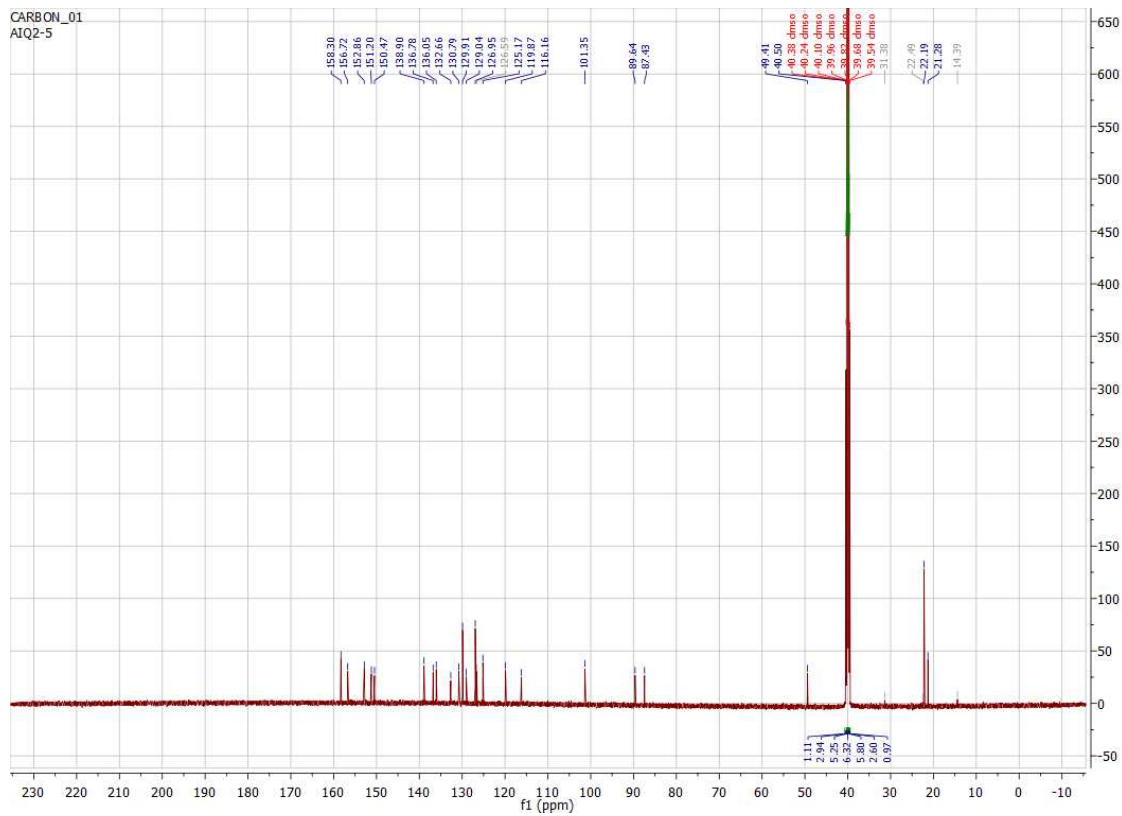

<sup>13</sup>CNMR Compound **2f**

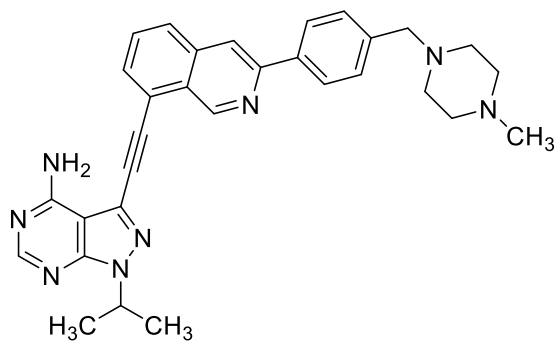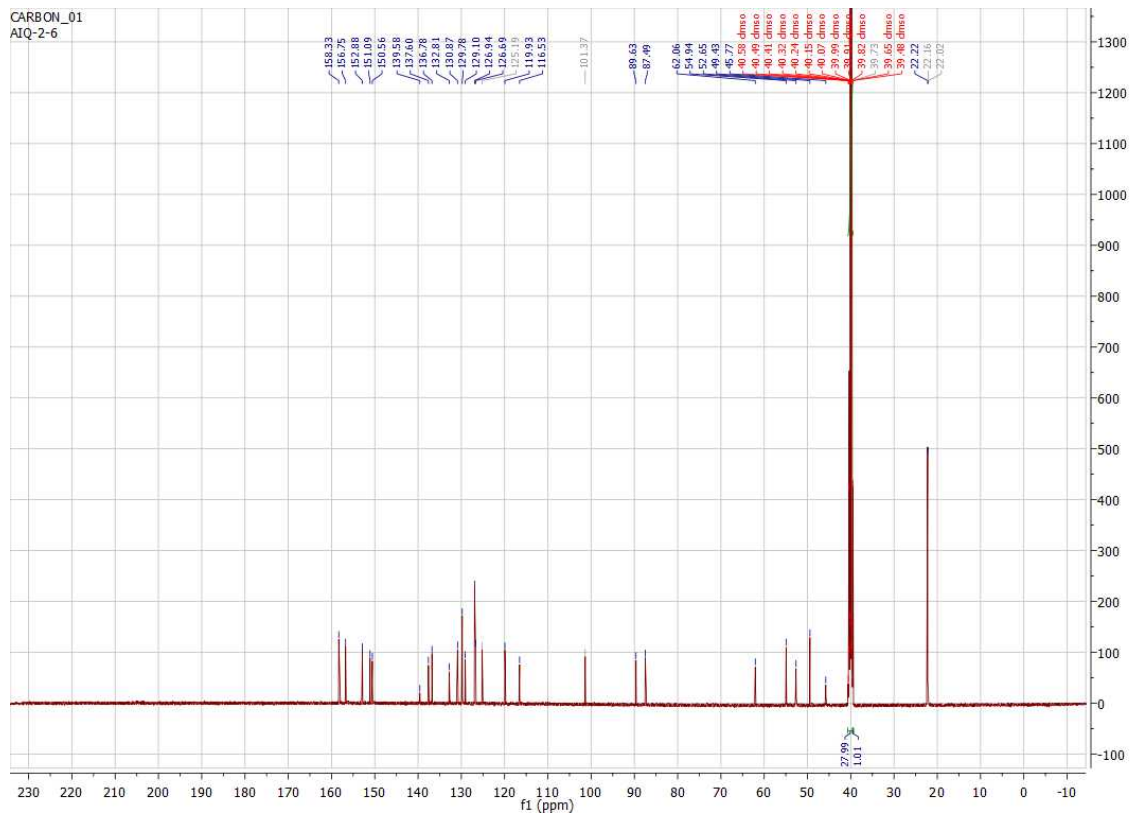

<sup>13</sup>CNMR Compound **2g**

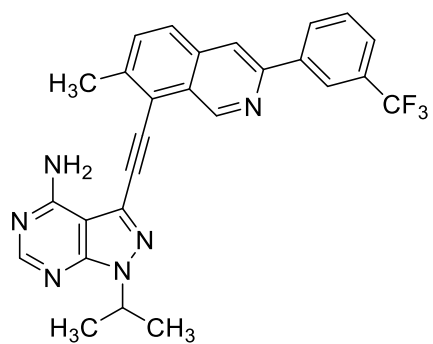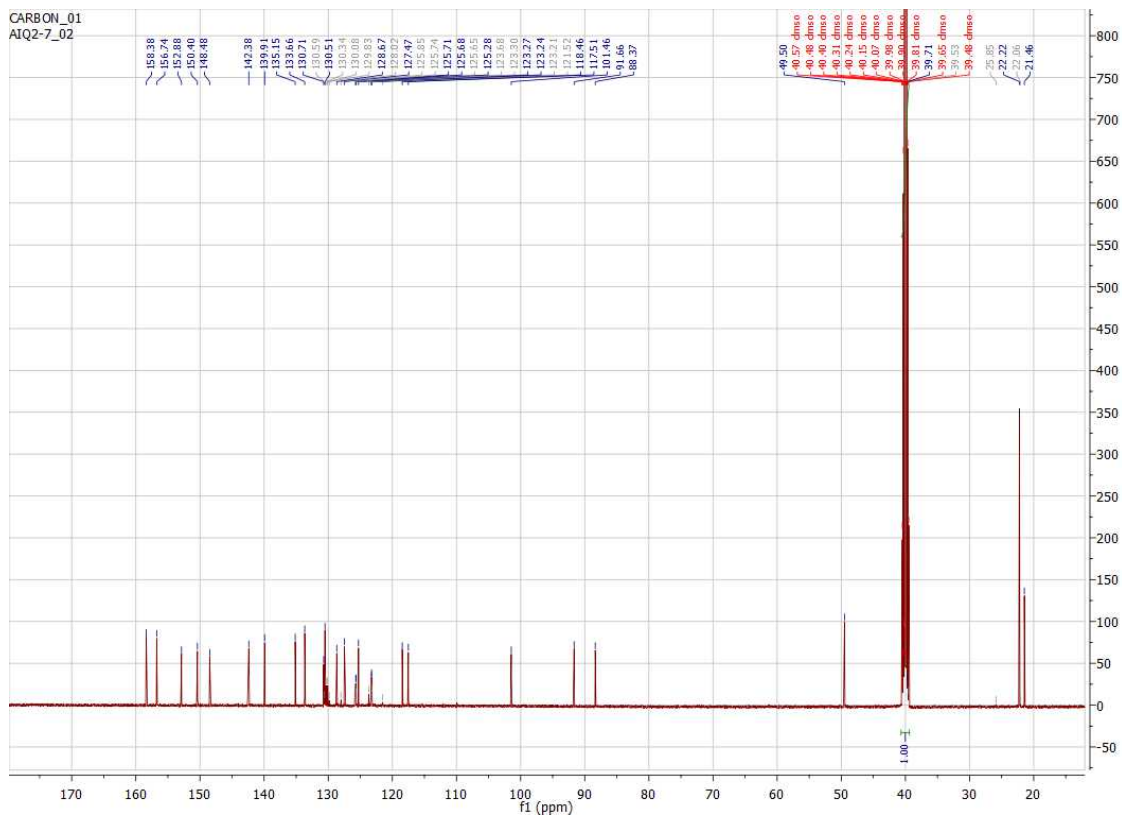

**SHIMADZU**  
**LabSolutions** Analysis Report

**<Sample Information>**

|                  |                                      |              |                        |
|------------------|--------------------------------------|--------------|------------------------|
| Sample Name      | : AIQ2-1 Purity 1mM in Acnitril      | Sample Type  | : Unknown              |
| Sample ID        | : 1                                  |              |                        |
| Data Filename    | : AIQ2-1 Purity 1mM in Acnitril1.lcd | Acquired by  | : System Administrator |
| Method Filename  | : AIQ2 100B-isocratic.lcm            | Processed by | : System Administrator |
| Batch Filename   | :                                    |              |                        |
| Vial #           | : 1-1                                |              |                        |
| Injection Volume | : 20 uL                              |              |                        |
| Date Acquired    | : 2/3/2017 3:13:04 PM                |              |                        |
| Date Processed   | : 2/3/2017 3:28:27 PM                |              |                        |

**<Chromatogram>**

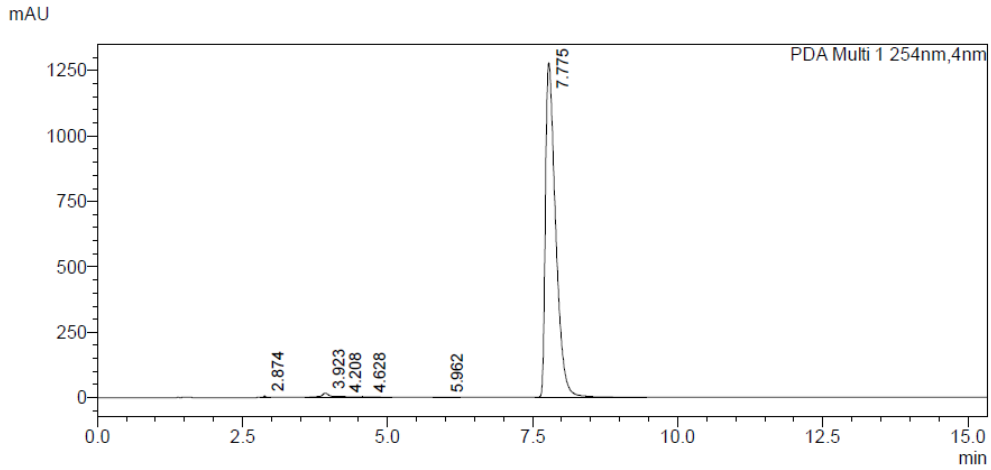

**<Peak Table>**

| PDA Ch1 254nm |           |          |         |
|---------------|-----------|----------|---------|
| Peak#         | Ret. Time | Area     | Area%   |
| 1             | 2.874     | 17491    | 0.109   |
| 2             | 3.923     | 198369   | 1.236   |
| 3             | 4.208     | 63588    | 0.396   |
| 4             | 4.628     | 42072    | 0.262   |
| 5             | 5.962     | 11979    | 0.075   |
| 6             | 7.775     | 15713460 | 97.922  |
| Total         |           | 16046959 | 100.000 |

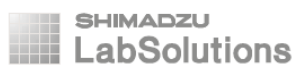

# Analysis Report

## <Sample Information>

|                  |                                      |              |                        |
|------------------|--------------------------------------|--------------|------------------------|
| Sample Name      | : AIQ2-2 Purity 1mM in Acnitril      | Sample Type  | : Unknown              |
| Sample ID        | : 1                                  |              |                        |
| Data Filename    | : AIQ2-2 Purity 1mM in Acnitril1.lcd |              |                        |
| Method Filename  | : AIQ2 100B-isocratic.lcm            |              |                        |
| Batch Filename   | :                                    |              |                        |
| Vial #           | : 1-1                                |              |                        |
| Injection Volume | : 20 uL                              | Acquired by  | : System Administrator |
| Date Acquired    | : 2/3/2017 4:01:49 PM                | Processed by | : System Administrator |
| Date Processed   | : 2/3/2017 4:15:59 PM                |              |                        |

## <Chromatogram>

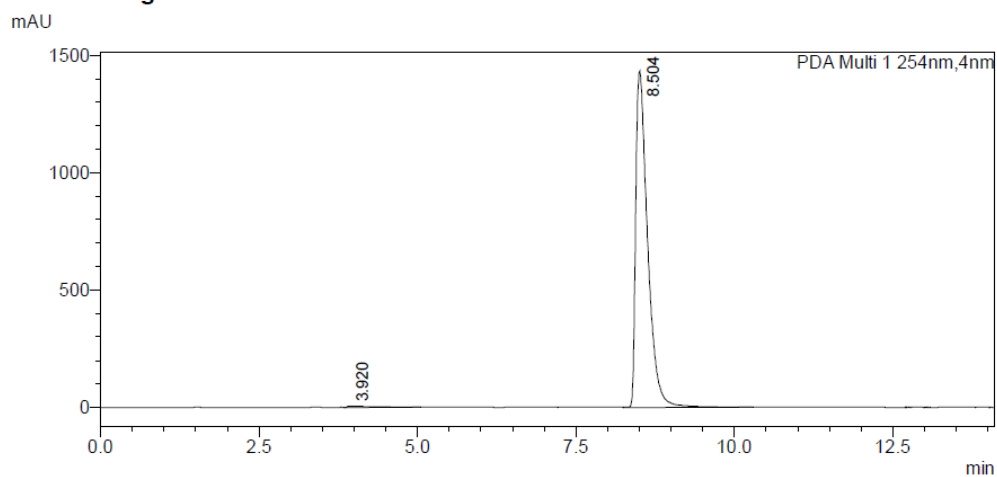

## <Peak Table>

| PDA Ch1 254nm |           |                 |                |
|---------------|-----------|-----------------|----------------|
| Peak#         | Ret. Time | Area            | Area%          |
| 1             | 3.920     | 185690          | 0.986          |
| 2             | 8.504     | 18653934        | 99.014         |
| <b>Total</b>  |           | <b>18839624</b> | <b>100.000</b> |

**SHIMADZU**  
**LabSolutions** Analysis Report

**<Sample Information>**

|                  |                                     |              |                        |
|------------------|-------------------------------------|--------------|------------------------|
| Sample Name      | : AIQ2-3 Purity 1mM in Acnitril     | Sample Type  | : Unknown              |
| Sample ID        | : 1                                 |              |                        |
| Data Filename    | : AIQ2-3 Purity 1mM in Acnitril.lcd | Acquired by  | : System Administrator |
| Method Filename  | : AIQ2 100B-isocratic.lcm           | Processed by | : System Administrator |
| Batch Filename   | :                                   |              |                        |
| Vial #           | : 1-1                               |              |                        |
| Injection Volume | : 20 uL                             |              |                        |
| Date Acquired    | : 2/3/2017 4:16:53 PM               |              |                        |
| Date Processed   | : 2/10/2017 6:01:34 PM              |              |                        |

**<Chromatogram>**

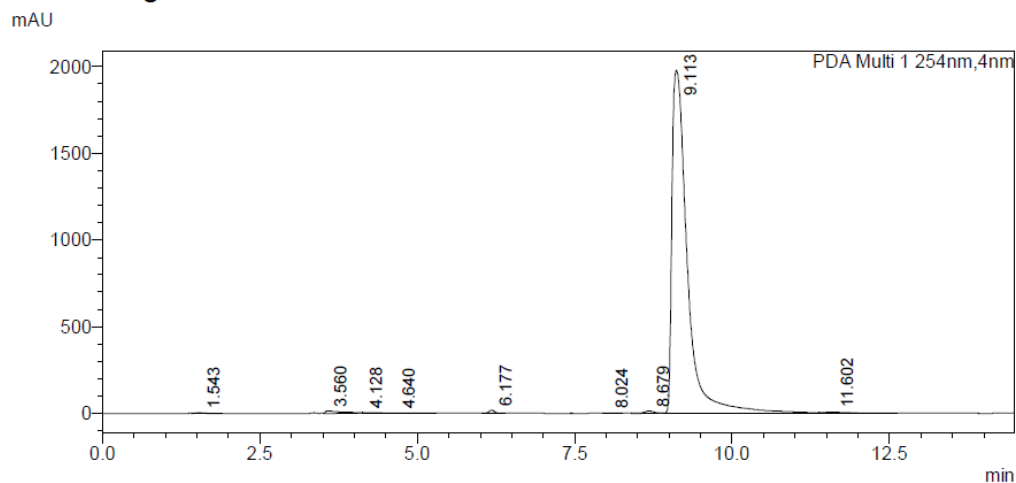

**<Peak Table>**

PDA Ch1 254nm

| Peak# | Ret. Time | Area     | Area%   |
|-------|-----------|----------|---------|
| 1     | 1.543     | 35708    | 0.103   |
| 2     | 3.560     | 294953   | 0.852   |
| 3     | 4.128     | 89454    | 0.258   |
| 4     | 4.640     | 40036    | 0.116   |
| 5     | 6.177     | 119263   | 0.345   |
| 6     | 8.024     | 21276    | 0.061   |
| 7     | 8.679     | 151410   | 0.437   |
| 8     | 9.113     | 33806980 | 97.684  |
| 9     | 11.602    | 49395    | 0.143   |
| Total |           | 34608473 | 100.000 |



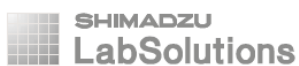

# Analysis Report

## <Sample Information>

|                  |                                      |              |                        |
|------------------|--------------------------------------|--------------|------------------------|
| Sample Name      | : AIQ2-4 Purity 1mM in Acnitril      | Sample Type  | : Unknown              |
| Sample ID        | : 1                                  | Acquired by  | : System Administrator |
| Data Filename    | : AIQ2-4 Purity 1mM in Acnitril1.lcd | Processed by | : System Administrator |
| Method Filename  | : AIQ2 100B-isocratic.lcm            |              |                        |
| Batch Filename   | :                                    |              |                        |
| Vial #           | : 1-1                                |              |                        |
| Injection Volume | : 20 uL                              |              |                        |
| Date Acquired    | : 2/3/2017 4:32:23 PM                |              |                        |
| Date Processed   | : 2/3/2017 4:45:20 PM                |              |                        |

## <Chromatogram>

mAU

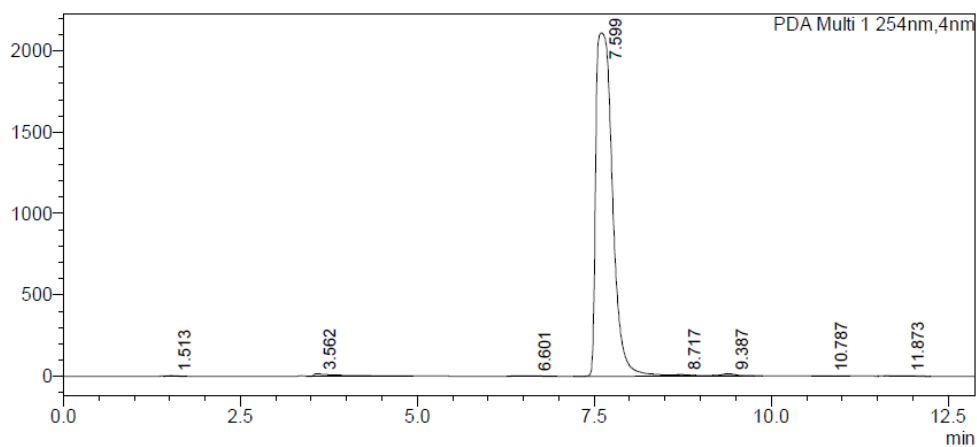

## <Peak Table>

PDA Ch1 254nm

| Peak# | Ret. Time | Area     | Area%   |
|-------|-----------|----------|---------|
| 1     | 1.513     | 27182    | 0.077   |
| 2     | 3.562     | 432736   | 1.223   |
| 3     | 6.601     | 28901    | 0.082   |
| 4     | 7.599     | 34628101 | 97.862  |
| 5     | 8.717     | 40811    | 0.115   |
| 6     | 9.387     | 162120   | 0.458   |
| 7     | 10.787    | 24004    | 0.068   |
| 8     | 11.873    | 40914    | 0.116   |
| Total |           | 35384769 | 100.000 |

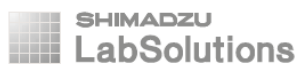

# Analysis Report

## <Sample Information>

|                  |                                      |              |                        |
|------------------|--------------------------------------|--------------|------------------------|
| Sample Name      | : AIQ2-5 Purity 1mM in Acnitril      | Sample Type  | : Unknown              |
| Sample ID        | : 1                                  |              |                        |
| Data Filename    | : AIQ2-5 Purity 1mM in Acnitril1.lcd | Acquired by  | : System Administrator |
| Method Filename  | : AIQ2 100B-isocratic.lcm            | Processed by | : System Administrator |
| Batch Filename   | :                                    |              |                        |
| Vial #           | : 1-1                                |              |                        |
| Injection Volume | : 20 uL                              |              |                        |
| Date Acquired    | : 2/3/2017 4:46:41 PM                |              |                        |
| Date Processed   | : 2/3/2017 5:01:51 PM                |              |                        |

## <Chromatogram>

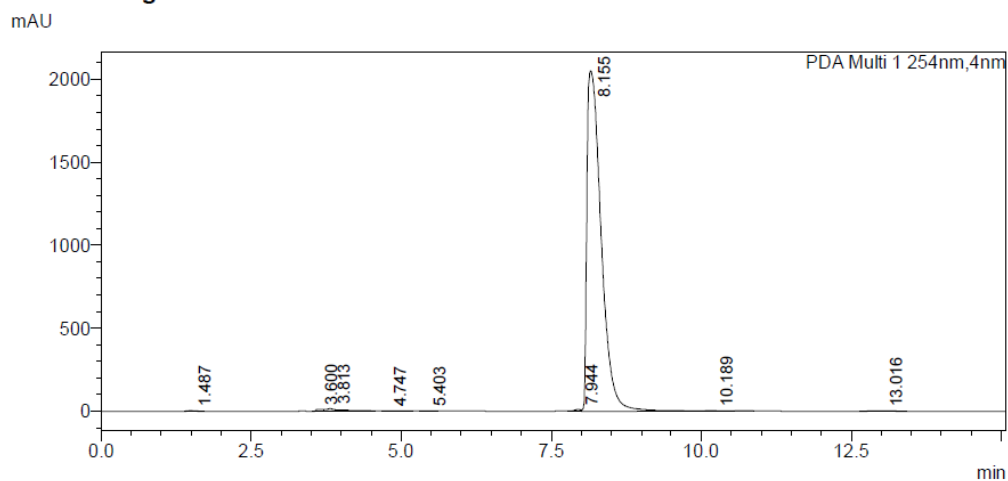

## <Peak Table>

| PDA Ch1 254nm |           |          |         |
|---------------|-----------|----------|---------|
| Peak#         | Ret. Time | Area     | Area%   |
| 1             | 1.487     | 26811    | 0.078   |
| 2             | 3.600     | 83820    | 0.243   |
| 3             | 3.813     | 354149   | 1.025   |
| 4             | 4.747     | 52830    | 0.153   |
| 5             | 5.403     | 20353    | 0.059   |
| 6             | 7.944     | 81136    | 0.235   |
| 7             | 8.155     | 33874330 | 98.035  |
| 8             | 10.189    | 37379    | 0.108   |
| 9             | 13.016    | 22346    | 0.065   |
| Total         |           | 34553153 | 100.000 |

**SHIMADZU**  
**LabSolutions** Analysis Report

**<Sample Information>**

Sample Name : AIQ2-6 purity 1mM in Acetonitril  
 Sample ID : 1  
 Data Filename : AIQ2-6 purity 1mM in Acnitril5.lcd  
 Method Filename : AIQ2 100B-isocratic.lcm  
 Batch Filename :  
 Vial # : 1-1  
 Injection Volume : 20 uL  
 Date Acquired : 2/6/2017 6:49:22 PM  
 Date Processed : 2/6/2017 6:53:49 PM  
 Sample Type : Unknown  
 Acquired by : System Administrator  
 Processed by : System Administrator

**<Chromatogram>**

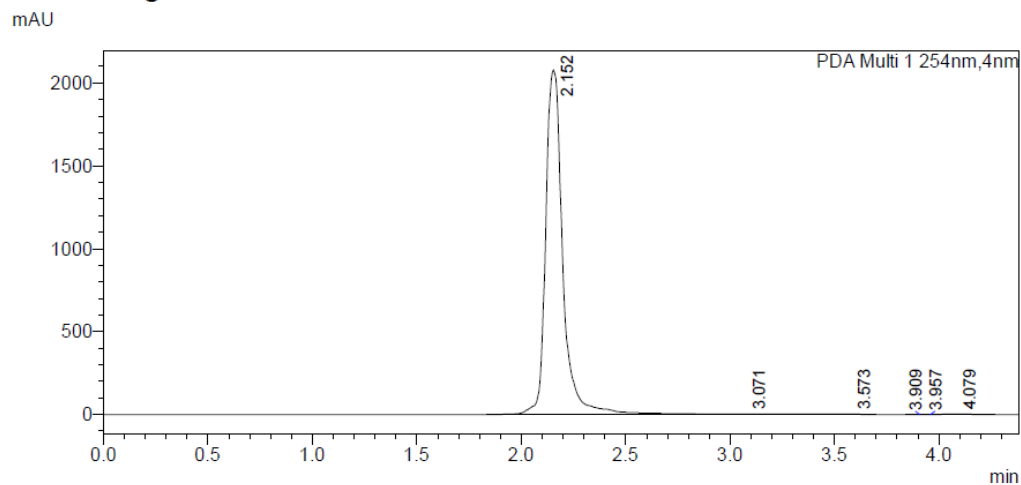

**<Peak Table>**

PDA Ch1 254nm

| Peak# | Ret. Time | Area     | Area%   |
|-------|-----------|----------|---------|
| 1     | 2.152     | 11938415 | 99.874  |
| 2     | 3.071     | 5822     | 0.049   |
| 3     | 3.573     | 6        | 0.000   |
| 4     | 3.909     | 498      | 0.004   |
| 5     | 3.957     | 523      | 0.004   |
| 6     | 4.079     | 8175     | 0.068   |
| Total |           | 11953438 | 100.000 |

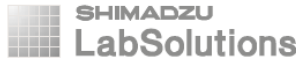

# Analysis Report

## <Sample Information>

|                  |                                      |              |                        |
|------------------|--------------------------------------|--------------|------------------------|
| Sample Name      | : AIQ2-7 Purity 1mM in Acnitril      | Sample Type  | : Unknown              |
| Sample ID        | : 1                                  |              |                        |
| Data Filename    | : AIQ2-7 Purity 1mM in Acnitril1.lcd | Acquired by  | : System Administrator |
| Method Filename  | : AIQ2 100B-isocratic.lcm            | Processed by | : System Administrator |
| Batch Filename   | :                                    |              |                        |
| Vial #           | : 1-1                                |              |                        |
| Injection Volume | : 20 uL                              |              |                        |
| Date Acquired    | : 2/3/2017 5:38:52 PM                |              |                        |
| Date Processed   | : 2/3/2017 5:52:40 PM                |              |                        |

## <Chromatogram>

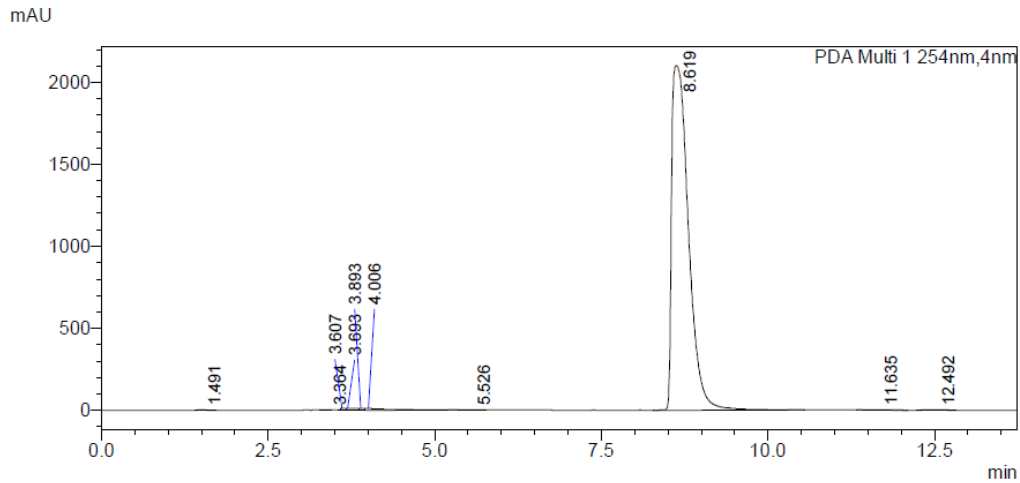

## <Peak Table>

| Peak# | Ret. Time | Area     | Area%   |
|-------|-----------|----------|---------|
| 1     | 1.491     | 12512    | 0.033   |
| 2     | 3.364     | 15832    | 0.042   |
| 3     | 3.607     | 62989    | 0.168   |
| 4     | 3.693     | 132644   | 0.354   |
| 5     | 3.893     | 54667    | 0.146   |
| 6     | 4.006     | 325347   | 0.867   |
| 7     | 5.526     | 16897    | 0.045   |
| 8     | 8.619     | 36827373 | 98.159  |
| 9     | 11.635    | 49536    | 0.132   |
| 10    | 12.492    | 20336    | 0.054   |
| Total |           | 37518133 | 100.000 |
